# Supplementary material for: Differential DNA Methylation and Gene Expression Between ALV-J-Positive and ALV-J-Negative Chickens
Source: Front Vet Sci. 2021 May 31;8:659840. doi: 10.3389/fvets.2021.659840 (PMC8203102; doi:10.3389/fvets.2021.659840)
Supplement: Supplementary Table 8 — Significantly enriched GO categories for DEGs. [file Table_8.XLS]

## Sheet: BP
ID	Term	GeneRatio	BgRatio	PValue	p.adjust	qvalue	geneID	Count
GO:0051234	establishment of localization	15/59	432/2032	0.258137	0.903077	0.903077	HNF1A/SEC23B/GPR50/SLC2A2/TGFB2/SPCS3/HOOK1/ARF6/GJC1/MON1A/MYO1G/SLC7A2/NDC80/HMGN3/VSNL1	15
GO:0048869	cellular developmental process	15/59	461/2032	0.353823	0.903077	0.903077	NEO1/FN1/SUPV3L1/SEC23B/TGFB2/C1GALT1/SUV39H2/ARF6/HOXB4/GJC1/STMN1/MGP/METTL14/SINHCAF/FAM206A	15
GO:0006810	transport	14/59	422/2032	0.33332	0.903077	0.903077	HNF1A/SEC23B/GPR50/SLC2A2/TGFB2/SPCS3/HOOK1/ARF6/GJC1/MON1A/MYO1G/SLC7A2/HMGN3/VSNL1	14
GO:0009889	regulation of biosynthetic process	14/59	487/2032	0.568745	0.905708	0.905708	CITED4/NEO1/HNF1A/GPR50/TGFB2/SUV39H2/DNAJC3/HOXB4/HDAC1/EGR1/EAF2/TEF/METTL14/HMGN3	14
GO:0043412	macromolecule modification	13/59	448/2032	0.553274	0.905708	0.905708	MTMR8/TGFB2/C1GALT1/METAP1/SUV39H2/DNAJC3/METTL2A/HDAC1/EGR1/LARGE2/BMT2/METTL14/DOHH	13
GO:0019219	regulation of nucleobase-containing compound metabolic process	13/59	464/2032	0.610583	0.911535	0.911535	CITED4/NEO1/SUPV3L1/HNF1A/GPR50/SUV39H2/HOXB4/HDAC1/EGR1/EAF2/TEF/METTL14/HMGN3	13
GO:0010556	regulation of macromolecule biosynthetic process	13/59	465/2032	0.614069	0.911535	0.911535	CITED4/NEO1/HNF1A/TGFB2/SUV39H2/DNAJC3/HOXB4/HDAC1/EGR1/EAF2/TEF/METTL14/HMGN3	13
GO:0031326	regulation of cellular biosynthetic process	13/59	483/2032	0.674444	0.922787	0.922787	CITED4/NEO1/HNF1A/GPR50/SUV39H2/DNAJC3/HOXB4/HDAC1/EGR1/EAF2/TEF/METTL14/HMGN3	13
GO:0010468	regulation of gene expression	13/59	499/2032	0.723797	0.935548	0.935548	CITED4/NEO1/SUPV3L1/HNF1A/SUV39H2/DNAJC3/HOXB4/HDAC1/EGR1/EAF2/TEF/METTL14/HMGN3	13
GO:0048523	negative regulation of cellular process	13/59	500/2032	0.726733	0.935548	0.935548	SUPV3L1/GPR50/TGFB2/SUV39H2/DNAJC3/HOXB4/BMT2/HSP90AB1/EAF2/METTL14/SINHCAF/NDC80/VSNL1	13
GO:0071702	organic substance transport	12/59	224/2032	0.023941	0.903077	0.903077	HNF1A/SEC23B/GPR50/SLC2A2/TGFB2/SPCS3/HOOK1/ARF6/MON1A/SLC7A2/HMGN3/VSNL1	12
GO:0051173	positive regulation of nitrogen compound metabolic process	12/59	367/2032	0.374037	0.903077	0.903077	CITED4/SUPV3L1/HNF1A/TGFB2/DNAJC3/HOXB4/HDAC1/EGR1/EAF2/TEF/METTL14/HMGN3	12
GO:0031325	positive regulation of cellular metabolic process	12/59	373/2032	0.397201	0.903077	0.903077	CITED4/SUPV3L1/HNF1A/TGFB2/DNAJC3/HOXB4/HDAC1/EGR1/EAF2/TEF/METTL14/HMGN3	12
GO:0010604	positive regulation of macromolecule metabolic process	12/59	376/2032	0.408851	0.903077	0.903077	CITED4/SUPV3L1/HNF1A/TGFB2/DNAJC3/HOXB4/HDAC1/EGR1/EAF2/TEF/METTL14/HMGN3	12
GO:0009893	positive regulation of metabolic process	12/59	397/2032	0.490718	0.903077	0.903077	CITED4/SUPV3L1/HNF1A/TGFB2/DNAJC3/HOXB4/HDAC1/EGR1/EAF2/TEF/METTL14/HMGN3	12
GO:0051252	regulation of RNA metabolic process	12/59	439/2032	0.646198	0.921662	0.921662	CITED4/NEO1/SUPV3L1/HNF1A/SUV39H2/HOXB4/HDAC1/EGR1/EAF2/TEF/METTL14/HMGN3	12
GO:0006996	organelle organization	12/59	443/2032	0.659835	0.922787	0.922787	SUPV3L1/SEC23B/HOOK1/SUV39H2/ARF6/STMN1/HDAC1/NDC80/MX1/CENPO/FAM206A/HIST1H2B5	12
GO:0030154	cell differentiation	12/59	445/2032	0.666556	0.922787	0.922787	NEO1/TGFB2/C1GALT1/SUV39H2/ARF6/HOXB4/GJC1/STMN1/MGP/METTL14/SINHCAF/FAM206A	12
GO:2000112	regulation of cellular macromolecule biosynthetic process	12/59	455/2032	0.699123	0.926722	0.926722	CITED4/NEO1/HNF1A/SUV39H2/DNAJC3/HOXB4/HDAC1/EGR1/EAF2/TEF/METTL14/HMGN3	12
GO:0034654	nucleobase-containing compound biosynthetic process	12/59	486/2032	0.78803	0.935548	0.935548	CITED4/NEO1/HNF1A/TK1/GPR50/SUV39H2/HOXB4/HDAC1/EGR1/EAF2/TEF/HMGN3	12
GO:0018130	heterocycle biosynthetic process	12/59	499/2032	0.819556	0.936594	0.936594	CITED4/NEO1/HNF1A/TK1/GPR50/SUV39H2/HOXB4/HDAC1/EGR1/EAF2/TEF/HMGN3	12
GO:0008104	protein localization	11/59	226/2032	0.0560816	0.903077	0.903077	HNF1A/SEC23B/TGFB2/SPCS3/HOOK1/ARF6/MON1A/HSP90AB1/NDC80/HMGN3/VSNL1	11
GO:0033036	macromolecule localization	11/59	262/2032	0.128843	0.903077	0.903077	HNF1A/SEC23B/TGFB2/SPCS3/HOOK1/ARF6/MON1A/HSP90AB1/NDC80/HMGN3/VSNL1	11
GO:0042221	response to chemical	11/59	400/2032	0.633731	0.914439	0.914439	CYP1A2/NEO1/TGFB2/SUV39H2/DNAJC3/EGR1/HSP90AB1/SLC7A2/MBP/HMGN3/VSNL1	11
GO:0071705	nitrogen compound transport	10/59	189/2032	0.042052	0.903077	0.903077	HNF1A/SEC23B/TGFB2/SPCS3/HOOK1/ARF6/MON1A/SLC7A2/HMGN3/VSNL1	10
GO:0051254	positive regulation of RNA metabolic process	10/59	230/2032	0.122152	0.903077	0.903077	CITED4/SUPV3L1/HNF1A/HOXB4/HDAC1/EGR1/EAF2/TEF/METTL14/HMGN3	10
GO:0010557	positive regulation of macromolecule biosynthetic process	10/59	237/2032	0.141263	0.903077	0.903077	CITED4/HNF1A/TGFB2/DNAJC3/HOXB4/HDAC1/EGR1/EAF2/TEF/HMGN3	10
GO:0043933	protein-containing complex subunit organization	10/59	243/2032	0.158867	0.903077	0.903077	TK1/SEC23B/TGFB2/ARF6/STMN1/NDC80/MX1/CENPO/FAM206A/HIST1H2B5	10
GO:0045935	positive regulation of nucleobase-containing compound metabolic process	10/59	245/2032	0.164979	0.903077	0.903077	CITED4/SUPV3L1/HNF1A/HOXB4/HDAC1/EGR1/EAF2/TEF/METTL14/HMGN3	10
GO:0006357	regulation of transcription by RNA polymerase II	10/59	252/2032	0.187292	0.903077	0.903077	CITED4/NEO1/HNF1A/SUV39H2/HOXB4/HDAC1/EGR1/EAF2/TEF/HMGN3	10
GO:0009891	positive regulation of biosynthetic process	10/59	253/2032	0.190593	0.903077	0.903077	CITED4/HNF1A/TGFB2/DNAJC3/HOXB4/HDAC1/EGR1/EAF2/TEF/HMGN3	10
GO:0006366	transcription by RNA polymerase II	10/59	258/2032	0.207504	0.903077	0.903077	CITED4/NEO1/HNF1A/SUV39H2/HOXB4/HDAC1/EGR1/EAF2/TEF/HMGN3	10
GO:0009653	anatomical structure morphogenesis	10/59	313/2032	0.424757	0.903077	0.903077	NEO1/FN1/SUPV3L1/SEC23B/TGFB2/C1GALT1/C1H2ORF49/HOXB4/GJC1/FAM206A	10
GO:0044085	cellular component biogenesis	10/59	352/2032	0.585819	0.905708	0.905708	CDH3/TK1/SEC23B/ARF6/GJC1/BMT2/MX1/CENPO/FAM206A/HIST1H2B5	10
GO:0006950	response to stress	10/59	357/2032	0.605315	0.907032	0.907032	FN1/SSRP1/TGFB2/SUV39H2/DNAJC3/AvBD13/AVD/MBL2/BMT2/MX1	10
GO:0048583	regulation of response to stimulus	10/59	375/2032	0.671949	0.922787	0.922787	NEO1/TGFB2/DNAJC3/ARF6/MBL2/MYO1G/BMT2/HSP90AB1/HMGN3/VSNL1	10
GO:0006355	regulation of transcription, DNA-templated	10/59	408/2032	0.776655	0.935548	0.935548	CITED4/NEO1/HNF1A/SUV39H2/HOXB4/HDAC1/EGR1/EAF2/TEF/HMGN3	10
GO:1903506	regulation of nucleic acid-templated transcription	10/59	415/2032	0.795668	0.936594	0.936594	CITED4/NEO1/HNF1A/SUV39H2/HOXB4/HDAC1/EGR1/EAF2/TEF/HMGN3	10
GO:2001141	regulation of RNA biosynthetic process	10/59	415/2032	0.795668	0.936594	0.936594	CITED4/NEO1/HNF1A/SUV39H2/HOXB4/HDAC1/EGR1/EAF2/TEF/HMGN3	10
GO:0006351	transcription, DNA-templated	10/59	416/2032	0.798291	0.936594	0.936594	CITED4/NEO1/HNF1A/SUV39H2/HOXB4/HDAC1/EGR1/EAF2/TEF/HMGN3	10
GO:0032774	RNA biosynthetic process	10/59	423/2032	0.816	0.936594	0.936594	CITED4/NEO1/HNF1A/SUV39H2/HOXB4/HDAC1/EGR1/EAF2/TEF/HMGN3	10
GO:0097659	nucleic acid-templated transcription	10/59	423/2032	0.816	0.936594	0.936594	CITED4/NEO1/HNF1A/SUV39H2/HOXB4/HDAC1/EGR1/EAF2/TEF/HMGN3	10
GO:0006464	cellular protein modification process	10/59	432/2032	0.837112	0.936594	0.936594	MTMR8/TGFB2/C1GALT1/METAP1/SUV39H2/DNAJC3/HDAC1/EGR1/LARGE2/DOHH	10
GO:0036211	protein modification process	10/59	432/2032	0.837112	0.936594	0.936594	MTMR8/TGFB2/C1GALT1/METAP1/SUV39H2/DNAJC3/HDAC1/EGR1/LARGE2/DOHH	10
GO:0015031	protein transport	9/59	155/2032	0.0318355	0.903077	0.903077	HNF1A/SEC23B/TGFB2/SPCS3/HOOK1/ARF6/MON1A/HMGN3/VSNL1	9
GO:0015833	peptide transport	9/59	159/2032	0.0367603	0.903077	0.903077	HNF1A/SEC23B/TGFB2/SPCS3/HOOK1/ARF6/MON1A/HMGN3/VSNL1	9
GO:0045184	establishment of protein localization	9/59	159/2032	0.0367603	0.903077	0.903077	HNF1A/SEC23B/TGFB2/SPCS3/HOOK1/ARF6/MON1A/HMGN3/VSNL1	9
GO:0042886	amide transport	9/59	160/2032	0.0380701	0.903077	0.903077	HNF1A/SEC23B/TGFB2/SPCS3/HOOK1/ARF6/MON1A/HMGN3/VSNL1	9
GO:0032879	regulation of localization	9/59	202/2032	0.124718	0.903077	0.903077	SEC23B/GPR50/TGFB2/ARF6/HSP90AB1/SINHCAF/NDC80/HMGN3/VSNL1	9
GO:0051128	regulation of cellular component organization	9/59	248/2032	0.288121	0.903077	0.903077	FN1/SUPV3L1/SEC23B/TGFB2/ARF6/STMN1/EAF2/NDC80/FAM206A	9
GO:0031328	positive regulation of cellular biosynthetic process	9/59	249/2032	0.292267	0.903077	0.903077	CITED4/HNF1A/DNAJC3/HOXB4/HDAC1/EGR1/EAF2/TEF/HMGN3	9
GO:0010628	positive regulation of gene expression	9/59	251/2032	0.300611	0.903077	0.903077	CITED4/HNF1A/DNAJC3/HOXB4/HDAC1/EGR1/EAF2/TEF/HMGN3	9
GO:0022607	cellular component assembly	9/59	328/2032	0.63046	0.914439	0.914439	CDH3/TK1/SEC23B/ARF6/GJC1/MX1/CENPO/FAM206A/HIST1H2B5	9
GO:0048513	animal organ development	9/59	348/2032	0.704202	0.930494	0.930494	HNF1A/TGFB2/C1GALT1/ARF6/HOXB4/GJC1/EAF2/MGP/METTL14	9
GO:0065008	regulation of biological quality	9/59	391/2032	0.830024	0.936594	0.936594	NEO1/FN1/HNF1A/SEC23B/ARF6/METTL14/HMGN3/VSNL1/FAM206A	9
GO:0045893	positive regulation of transcription, DNA-templated	8/59	210/2032	0.26015	0.903077	0.903077	CITED4/HNF1A/HOXB4/HDAC1/EGR1/EAF2/TEF/HMGN3	8
GO:1902680	positive regulation of RNA biosynthetic process	8/59	220/2032	0.303879	0.903077	0.903077	CITED4/HNF1A/HOXB4/HDAC1/EGR1/EAF2/TEF/HMGN3	8
GO:1903508	positive regulation of nucleic acid-templated transcription	8/59	220/2032	0.303879	0.903077	0.903077	CITED4/HNF1A/HOXB4/HDAC1/EGR1/EAF2/TEF/HMGN3	8
GO:0051641	cellular localization	8/59	233/2032	0.363153	0.903077	0.903077	SEC23B/SPCS3/HOOK1/ARF6/HSP90AB1/NDC80/HMGN3/VSNL1	8
GO:1901566	organonitrogen compound biosynthetic process	8/59	238/2032	0.386396	0.903077	0.903077	GPR50/TGFB2/C1GALT1/ODC1/DNAJC3/EARS2/LARGE2/METTL14	8
GO:0009892	negative regulation of metabolic process	8/59	291/2032	0.625323	0.911535	0.911535	SUPV3L1/GPR50/TGFB2/SUV39H2/DNAJC3/HOXB4/HSP90AB1/METTL14	8
GO:0006796	phosphate-containing compound metabolic process	8/59	354/2032	0.83319	0.936594	0.936594	TK1/MTMR8/GPR50/TGFB2/DNAJC3/LCAT/NT5C3B/MBOAT2	8
GO:0006793	phosphorus metabolic process	8/59	355/2032	0.835619	0.936594	0.936594	TK1/MTMR8/GPR50/TGFB2/DNAJC3/LCAT/NT5C3B/MBOAT2	8
GO:0051649	establishment of localization in cell	7/59	173/2032	0.232197	0.903077	0.903077	SEC23B/SPCS3/HOOK1/ARF6/NDC80/HMGN3/VSNL1	7
GO:0065003	protein-containing complex assembly	7/59	212/2032	0.420032	0.903077	0.903077	TK1/SEC23B/ARF6/MX1/CENPO/FAM206A/HIST1H2B5	7
GO:0007399	nervous system development	7/59	249/2032	0.598109	0.905708	0.905708	NEO1/TGFB2/ARF6/STMN1/METTL14/MBP/FAM206A	7
GO:0050793	regulation of developmental process	7/59	252/2032	0.611485	0.911535	0.911535	FN1/SEC23B/TGFB2/ARF6/HOXB4/EAF2/SINHCAF	7
GO:0048468	cell development	7/59	253/2032	0.615895	0.911535	0.911535	NEO1/TGFB2/C1GALT1/ARF6/GJC1/STMN1/FAM206A	7
GO:0031324	negative regulation of cellular metabolic process	7/59	262/2032	0.654423	0.922787	0.922787	GPR50/TGFB2/SUV39H2/DNAJC3/HOXB4/HSP90AB1/METTL14	7
GO:0010033	response to organic substance	7/59	273/2032	0.69846	0.926722	0.926722	NEO1/TGFB2/DNAJC3/EGR1/HSP90AB1/HMGN3/VSNL1	7
GO:0070887	cellular response to chemical stimulus	7/59	283/2032	0.735367	0.935548	0.935548	NEO1/TGFB2/SUV39H2/EGR1/HSP90AB1/HMGN3/VSNL1	7
GO:0010646	regulation of cell communication	7/59	326/2032	0.859043	0.942018	0.942018	NEO1/TGFB2/ARF6/BMT2/HSP90AB1/HMGN3/VSNL1	7
GO:0023051	regulation of signaling	7/59	331/2032	0.869897	0.945328	0.945328	NEO1/TGFB2/ARF6/BMT2/HSP90AB1/HMGN3/VSNL1	7
GO:0060341	regulation of cellular localization	6/59	74/2032	0.0185103	0.903077	0.903077	SEC23B/ARF6/HSP90AB1/NDC80/HMGN3/VSNL1	6
GO:0032880	regulation of protein localization	6/59	78/2032	0.0234625	0.903077	0.903077	TGFB2/ARF6/HSP90AB1/NDC80/HMGN3/VSNL1	6
GO:0019637	organophosphate metabolic process	6/59	116/2032	0.116322	0.903077	0.903077	TK1/MTMR8/GPR50/LCAT/NT5C3B/MBOAT2	6
GO:0032989	cellular component morphogenesis	6/59	145/2032	0.241408	0.903077	0.903077	NEO1/FN1/SUPV3L1/SEC23B/TGFB2/FAM206A	6
GO:0034622	cellular protein-containing complex assembly	6/59	149/2032	0.261348	0.903077	0.903077	SEC23B/ARF6/MX1/CENPO/FAM206A/HIST1H2B5	6
GO:0040011	locomotion	6/59	155/2032	0.292082	0.903077	0.903077	NEO1/FN1/TGFB2/ARF6/MYO1G/SINHCAF	6
GO:0045944	positive regulation of transcription by RNA polymerase II	6/59	164/2032	0.339562	0.903077	0.903077	HOXB4/HDAC1/EGR1/EAF2/TEF/HMGN3	6
GO:0006928	movement of cell or subcellular component	6/59	170/2032	0.371789	0.903077	0.903077	NEO1/FN1/TGFB2/ARF6/MYO1G/SINHCAF	6
GO:0051276	chromosome organization	6/59	178/2032	0.415016	0.903077	0.903077	SUPV3L1/SUV39H2/HDAC1/NDC80/CENPO/HIST1H2B5	6
GO:0002376	immune system process	6/59	181/2032	0.431208	0.903077	0.903077	TGFB2/AVD/HOXB4/MBL2/MYO1G/MX1	6
GO:0048699	generation of neurons	6/59	182/2032	0.436595	0.903077	0.903077	NEO1/TGFB2/ARF6/STMN1/METTL14/FAM206A	6
GO:0022008	neurogenesis	6/59	187/2032	0.463416	0.903077	0.903077	NEO1/TGFB2/ARF6/STMN1/METTL14/FAM206A	6
GO:0044248	cellular catabolic process	6/59	197/2032	0.516139	0.903491	0.903491	SUPV3L1/MTMR8/SEC23B/GPR50/HSP90AB1/METTL14	6
GO:0048584	positive regulation of response to stimulus	6/59	201/2032	0.536747	0.903491	0.903491	NEO1/TGFB2/MBL2/MYO1G/HSP90AB1/VSNL1	6
GO:0009605	response to external stimulus	6/59	205/2032	0.557013	0.905708	0.905708	NEO1/TGFB2/AvBD13/AVD/BMT2/MX1	6
GO:0044281	small molecule metabolic process	6/59	205/2032	0.557013	0.905708	0.905708	TK1/GPR50/ODC1/LCAT/NT5C3B/EARS2	6
GO:0009888	tissue development	6/59	213/2032	0.596368	0.905708	0.905708	TGFB2/C1GALT1/C1H2ORF49/HOXB4/GJC1/MGP	6
GO:0009056	catabolic process	6/59	216/2032	0.610678	0.911535	0.911535	SUPV3L1/MTMR8/SEC23B/GPR50/HSP90AB1/METTL14	6
GO:0071310	cellular response to organic substance	6/59	225/2032	0.651984	0.922787	0.922787	NEO1/TGFB2/EGR1/HSP90AB1/HMGN3/VSNL1	6
GO:0051172	negative regulation of nitrogen compound metabolic process	6/59	248/2032	0.745271	0.935548	0.935548	GPR50/SUV39H2/DNAJC3/HOXB4/HSP90AB1/METTL14	6
GO:0010605	negative regulation of macromolecule metabolic process	6/59	272/2032	0.822695	0.936594	0.936594	SUPV3L1/SUV39H2/DNAJC3/HOXB4/HSP90AB1/METTL14	6
GO:0007166	cell surface receptor signaling pathway	6/59	283/2032	0.851586	0.939178	0.939178	NEO1/TGFB2/MYO1G/EGR1/HSP90AB1/PTCH1	6
GO:0009306	protein secretion	5/59	44/2032	0.00792229	0.903077	0.903077	HNF1A/TGFB2/MON1A/HMGN3/VSNL1	5
GO:0002790	peptide secretion	5/59	47/2032	0.01047	0.903077	0.903077	HNF1A/TGFB2/MON1A/HMGN3/VSNL1	5
GO:0031329	regulation of cellular catabolic process	5/59	55/2032	0.0198944	0.903077	0.903077	SUPV3L1/MTMR8/GPR50/HSP90AB1/METTL14	5
GO:0009894	regulation of catabolic process	5/59	64/2032	0.0357623	0.903077	0.903077	SUPV3L1/MTMR8/GPR50/HSP90AB1/METTL14	5
GO:0032940	secretion by cell	5/59	78/2032	0.0728818	0.903077	0.903077	HNF1A/TGFB2/MON1A/HMGN3/VSNL1	5
GO:0046903	secretion	5/59	82/2032	0.0863392	0.903077	0.903077	HNF1A/TGFB2/MON1A/HMGN3/VSNL1	5
GO:0097435	supramolecular fiber organization	5/59	96/2032	0.142845	0.903077	0.903077	TGFB2/HOOK1/ARF6/STMN1/FAM206A	5
GO:0006955	immune response	5/59	104/2032	0.180982	0.903077	0.903077	TGFB2/AVD/MBL2/MYO1G/MX1	5
GO:0006952	defense response	5/59	114/2032	0.233421	0.903077	0.903077	FN1/AvBD13/AVD/MBL2/MX1	5
GO:0016192	vesicle-mediated transport	5/59	116/2032	0.244427	0.903077	0.903077	SEC23B/HOOK1/ARF6/MYO1G/VSNL1	5
GO:0016477	cell migration	5/59	117/2032	0.249985	0.903077	0.903077	FN1/TGFB2/ARF6/MYO1G/SINHCAF	5
GO:0000902	cell morphogenesis	5/59	121/2032	0.272545	0.903077	0.903077	NEO1/FN1/SEC23B/TGFB2/FAM206A	5
GO:0048870	cell motility	5/59	122/2032	0.27826	0.903077	0.903077	FN1/TGFB2/ARF6/MYO1G/SINHCAF	5
GO:0051674	localization of cell	5/59	123/2032	0.284001	0.903077	0.903077	FN1/TGFB2/ARF6/MYO1G/SINHCAF	5
GO:0033043	regulation of organelle organization	5/59	124/2032	0.289767	0.903077	0.903077	SEC23B/ARF6/STMN1/NDC80/FAM206A	5
GO:0048666	neuron development	5/59	130/2032	0.324806	0.903077	0.903077	NEO1/TGFB2/ARF6/STMN1/FAM206A	5
GO:0051049	regulation of transport	5/59	132/2032	0.336618	0.903077	0.903077	SEC23B/GPR50/TGFB2/HMGN3/VSNL1	5
GO:0051704	multi-organism process	5/59	142/2032	0.396134	0.903077	0.903077	TGFB2/AvBD13/AVD/METTL14/MX1	5
GO:0034613	cellular protein localization	5/59	146/2032	0.419948	0.903077	0.903077	SEC23B/SPCS3/ARF6/HSP90AB1/NDC80	5
GO:0070727	cellular macromolecule localization	5/59	147/2032	0.425885	0.903077	0.903077	SEC23B/SPCS3/ARF6/HSP90AB1/NDC80	5
GO:0030182	neuron differentiation	5/59	165/2032	0.530188	0.903491	0.903491	NEO1/TGFB2/ARF6/STMN1/FAM206A	5
GO:0007010	cytoskeleton organization	5/59	167/2032	0.541336	0.905708	0.905708	HOOK1/ARF6/STMN1/NDC80/FAM206A	5
GO:0033554	cellular response to stress	5/59	212/2032	0.754213	0.935548	0.935548	SSRP1/TGFB2/SUV39H2/DNAJC3/BMT2	5
GO:0032268	regulation of cellular protein metabolic process	5/59	267/2032	0.905046	0.96215	0.96215	TGFB2/DNAJC3/EGR1/HSP90AB1/METTL14	5
GO:0051239	regulation of multicellular organismal process	5/59	270/2032	0.910314	0.96215	0.96215	TGFB2/ARF6/GJC1/HSP90AB1/EAF2	5
GO:0051246	regulation of protein metabolic process	5/59	279/2032	0.924654	0.96215	0.96215	TGFB2/DNAJC3/EGR1/HSP90AB1/METTL14	5
GO:0009966	regulation of signal transduction	5/59	303/2032	0.953641	0.972699	0.972699	NEO1/TGFB2/ARF6/BMT2/HSP90AB1	5
GO:0043414	macromolecule methylation	4/59	31/2032	0.0112322	0.903077	0.903077	SUV39H2/METTL2A/BMT2/METTL14	4
GO:0032259	methylation	4/59	40/2032	0.0268806	0.903077	0.903077	SUV39H2/METTL2A/BMT2/METTL14	4
GO:0034330	cell junction organization	4/59	40/2032	0.0268806	0.903077	0.903077	CDH3/TGFB2/ARF6/GJC1	4
GO:0048732	gland development	4/59	40/2032	0.0268806	0.903077	0.903077	HNF1A/TGFB2/ARF6/EAF2	4
GO:0002252	immune effector process	4/59	50/2032	0.054711	0.903077	0.903077	TGFB2/MBL2/MYO1G/MX1	4
GO:0061024	membrane organization	4/59	53/2032	0.0652695	0.903077	0.903077	SEC23B/TGFB2/MBP/MX1	4
GO:0043207	response to external biotic stimulus	4/59	83/2032	0.218714	0.903077	0.903077	TGFB2/AvBD13/AVD/MX1	4
GO:0051707	response to other organism	4/59	83/2032	0.218714	0.903077	0.903077	TGFB2/AvBD13/AVD/MX1	4
GO:0009607	response to biotic stimulus	4/59	85/2032	0.23128	0.903077	0.903077	TGFB2/AvBD13/AVD/MX1	4
GO:0048878	chemical homeostasis	4/59	99/2032	0.323313	0.903077	0.903077	NEO1/HNF1A/HMGN3/VSNL1	4
GO:0006396	RNA processing	4/59	101/2032	0.336813	0.903077	0.903077	SUPV3L1/METTL2A/BMT2/METTL14	4
GO:0006629	lipid metabolic process	4/59	101/2032	0.336813	0.903077	0.903077	MTMR8/MSMO1/LCAT/MBOAT2	4
GO:0060429	epithelium development	4/59	106/2032	0.370676	0.903077	0.903077	TGFB2/C1GALT1/C1H2ORF49/HOXB4	4
GO:0006518	peptide metabolic process	4/59	110/2032	0.397747	0.903077	0.903077	SPCS3/DNAJC3/EARS2/METTL14	4
GO:0031175	neuron projection development	4/59	114/2032	0.42467	0.903077	0.903077	NEO1/ARF6/STMN1/FAM206A	4
GO:0006325	chromatin organization	4/59	115/2032	0.431364	0.903077	0.903077	SUPV3L1/SUV39H2/HDAC1/HIST1H2B5	4
GO:0055114	oxidation-reduction process	4/59	115/2032	0.431364	0.903077	0.903077	CYP1A2/MSMO1/HSD11B1L/DOHH	4
GO:1901135	carbohydrate derivative metabolic process	4/59	125/2032	0.497073	0.903491	0.903491	TK1/GPR50/C1GALT1/LARGE2	4
GO:0043603	cellular amide metabolic process	4/59	130/2032	0.528812	0.903491	0.903491	SPCS3/DNAJC3/EARS2/METTL14	4
GO:0030030	cell projection organization	4/59	140/2032	0.589368	0.905708	0.905708	NEO1/ARF6/STMN1/FAM206A	4
GO:0055085	transmembrane transport	4/59	140/2032	0.589368	0.905708	0.905708	GPR50/SLC2A2/GJC1/SLC7A2	4
GO:0120036	plasma membrane bounded cell projection organization	4/59	140/2032	0.589368	0.905708	0.905708	NEO1/ARF6/STMN1/FAM206A	4
GO:0046907	intracellular transport	4/59	142/2032	0.600954	0.905708	0.905708	SEC23B/SPCS3/HOOK1/ARF6	4
GO:0007155	cell adhesion	4/59	157/2032	0.681598	0.924051	0.924051	CDH3/NEO1/FN1/TGFB2	4
GO:0022610	biological adhesion	4/59	157/2032	0.681598	0.924051	0.924051	CDH3/NEO1/FN1/TGFB2	4
GO:0007267	cell-cell signaling	4/59	165/2032	0.71986	0.935548	0.935548	HNF1A/GJC1/HMGN3/VSNL1	4
GO:0010647	positive regulation of cell communication	4/59	168/2032	0.733338	0.935548	0.935548	NEO1/TGFB2/HSP90AB1/VSNL1	4
GO:0023056	positive regulation of signaling	4/59	170/2032	0.74206	0.935548	0.935548	NEO1/TGFB2/HSP90AB1/VSNL1	4
GO:0042592	homeostatic process	4/59	173/2032	0.754749	0.935548	0.935548	NEO1/HNF1A/HMGN3/VSNL1	4
GO:0031327	negative regulation of cellular biosynthetic process	4/59	175/2032	0.762948	0.935548	0.935548	GPR50/SUV39H2/HOXB4/METTL14	4
GO:0009890	negative regulation of biosynthetic process	4/59	177/2032	0.77094	0.935548	0.935548	GPR50/SUV39H2/HOXB4/METTL14	4
GO:1901575	organic substance catabolic process	4/59	177/2032	0.77094	0.935548	0.935548	SUPV3L1/GPR50/HSP90AB1/METTL14	4
GO:0006915	apoptotic process	4/59	186/2032	0.804395	0.936594	0.936594	SUPV3L1/TGFB2/C1H2ORF49/ARF6	4
GO:0045595	regulation of cell differentiation	4/59	188/2032	0.811284	0.936594	0.936594	TGFB2/ARF6/HOXB4/SINHCAF	4
GO:0012501	programmed cell death	4/59	191/2032	0.821257	0.936594	0.936594	SUPV3L1/TGFB2/C1H2ORF49/ARF6	4
GO:0008283	cell proliferation	4/59	193/2032	0.82767	0.936594	0.936594	TGFB2/HOXB4/EAF2/SINHCAF	4
GO:0010629	negative regulation of gene expression	4/59	194/2032	0.830806	0.936594	0.936594	SUPV3L1/SUV39H2/HOXB4/METTL14	4
GO:0008219	cell death	4/59	203/2032	0.857008	0.941101	0.941101	SUPV3L1/TGFB2/C1H2ORF49/ARF6	4
GO:0007049	cell cycle	4/59	211/2032	0.877402	0.950287	0.950287	TGFB2/SUV39H2/HSP90AB1/NDC80	4
GO:0016310	phosphorylation	4/59	253/2032	0.948582	0.971463	0.971463	TK1/GPR50/TGFB2/DNAJC3	4
GO:0065009	regulation of molecular function	4/59	316/2032	0.988182	0.988182	0.988182	SEC23B/TGFB2/DNAJC3/HMGN3	4
GO:0009451	RNA modification	3/59	15/2032	0.00825394	0.903077	0.903077	METTL2A/BMT2/METTL14	3
GO:0097164	ammonium ion metabolic process	3/59	15/2032	0.00825394	0.903077	0.903077	TGFB2/ODC1/LCAT	3
GO:0030073	insulin secretion	3/59	17/2032	0.0118368	0.903077	0.903077	HNF1A/HMGN3/VSNL1	3
GO:0033500	carbohydrate homeostasis	3/59	17/2032	0.0118368	0.903077	0.903077	HNF1A/HMGN3/VSNL1	3
GO:0042593	glucose homeostasis	3/59	17/2032	0.0118368	0.903077	0.903077	HNF1A/HMGN3/VSNL1	3
GO:0090100	positive regulation of transmembrane receptor protein serine/threonine kinase signaling pathway	3/59	21/2032	0.0213235	0.903077	0.903077	NEO1/TGFB2/HSP90AB1	3
GO:0045216	cell-cell junction organization	3/59	22/2032	0.0241894	0.903077	0.903077	CDH3/TGFB2/GJC1	3
GO:0030072	peptide hormone secretion	3/59	23/2032	0.027254	0.903077	0.903077	HNF1A/HMGN3/VSNL1	3
GO:0050708	regulation of protein secretion	3/59	30/2032	0.0541754	0.903077	0.903077	TGFB2/HMGN3/VSNL1	3
GO:0006644	phospholipid metabolic process	3/59	32/2032	0.0635572	0.903077	0.903077	MTMR8/LCAT/MBOAT2	3
GO:0051258	protein polymerization	3/59	33/2032	0.0685139	0.903077	0.903077	ARF6/MX1/FAM206A	3
GO:0090092	regulation of transmembrane receptor protein serine/threonine kinase signaling pathway	3/59	33/2032	0.0685139	0.903077	0.903077	NEO1/TGFB2/HSP90AB1	3
GO:0002791	regulation of peptide secretion	3/59	34/2032	0.0736425	0.903077	0.903077	TGFB2/HMGN3/VSNL1	3
GO:0046879	hormone secretion	3/59	34/2032	0.0736425	0.903077	0.903077	HNF1A/HMGN3/VSNL1	3
GO:0009914	hormone transport	3/59	35/2032	0.0789389	0.903077	0.903077	HNF1A/HMGN3/VSNL1	3
GO:0009952	anterior/posterior pattern specification	3/59	36/2032	0.0843988	0.903077	0.903077	TGFB2/C1H2ORF49/HOXB4	3
GO:0010256	endomembrane system organization	3/59	36/2032	0.0843988	0.903077	0.903077	SEC23B/TGFB2/HOOK1	3
GO:0045787	positive regulation of cell cycle	3/59	37/2032	0.0900177	0.903077	0.903077	TGFB2/HSP90AB1/NDC80	3
GO:1903827	regulation of cellular protein localization	3/59	43/2032	0.126803	0.903077	0.903077	ARF6/HSP90AB1/NDC80	3
GO:0010563	negative regulation of phosphorus metabolic process	3/59	44/2032	0.133399	0.903077	0.903077	GPR50/TGFB2/DNAJC3	3
GO:0045936	negative regulation of phosphate metabolic process	3/59	44/2032	0.133399	0.903077	0.903077	GPR50/TGFB2/DNAJC3	3
GO:0018205	peptidyl-lysine modification	3/59	46/2032	0.146945	0.903077	0.903077	SUV39H2/EGR1/DOHH	3
GO:0043254	regulation of protein complex assembly	3/59	46/2032	0.146945	0.903077	0.903077	SEC23B/ARF6/FAM206A	3
GO:0051223	regulation of protein transport	3/59	46/2032	0.146945	0.903077	0.903077	TGFB2/HMGN3/VSNL1	3
GO:0007178	transmembrane receptor protein serine/threonine kinase signaling pathway	3/59	47/2032	0.153884	0.903077	0.903077	NEO1/TGFB2/HSP90AB1	3
GO:0023061	signal release	3/59	47/2032	0.153884	0.903077	0.903077	HNF1A/HMGN3/VSNL1	3
GO:0050778	positive regulation of immune response	3/59	48/2032	0.160928	0.903077	0.903077	TGFB2/MBL2/MYO1G	3
GO:0070201	regulation of establishment of protein localization	3/59	48/2032	0.160928	0.903077	0.903077	TGFB2/HMGN3/VSNL1	3
GO:0045786	negative regulation of cell cycle	3/59	49/2032	0.16807	0.903077	0.903077	TGFB2/HSP90AB1/NDC80	3
GO:0090087	regulation of peptide transport	3/59	50/2032	0.175305	0.903077	0.903077	TGFB2/HMGN3/VSNL1	3
GO:0001558	regulation of cell growth	3/59	51/2032	0.18263	0.903077	0.903077	SUPV3L1/TGFB2/EAF2	3
GO:0003002	regionalization	3/59	52/2032	0.190037	0.903077	0.903077	TGFB2/C1H2ORF49/HOXB4	3
GO:0010817	regulation of hormone levels	3/59	53/2032	0.197523	0.903077	0.903077	HNF1A/HMGN3/VSNL1	3
GO:0034655	nucleobase-containing compound catabolic process	3/59	55/2032	0.212711	0.903077	0.903077	SUPV3L1/GPR50/METTL14	3
GO:0034660	ncRNA metabolic process	3/59	55/2032	0.212711	0.903077	0.903077	METTL2A/EARS2/BMT2	3
GO:1903530	regulation of secretion by cell	3/59	56/2032	0.220402	0.903077	0.903077	TGFB2/HMGN3/VSNL1	3
GO:0016311	dephosphorylation	3/59	57/2032	0.228153	0.903077	0.903077	MTMR8/TGFB2/NT5C3B	3
GO:0046700	heterocycle catabolic process	3/59	58/2032	0.235957	0.903077	0.903077	SUPV3L1/GPR50/METTL14	3
GO:0050776	regulation of immune response	3/59	58/2032	0.235957	0.903077	0.903077	TGFB2/MBL2/MYO1G	3
GO:0051046	regulation of secretion	3/59	58/2032	0.235957	0.903077	0.903077	TGFB2/HMGN3/VSNL1	3
GO:0051493	regulation of cytoskeleton organization	3/59	58/2032	0.235957	0.903077	0.903077	ARF6/STMN1/FAM206A	3
GO:0000226	microtubule cytoskeleton organization	3/59	59/2032	0.243811	0.903077	0.903077	HOOK1/STMN1/NDC80	3
GO:0019439	aromatic compound catabolic process	3/59	59/2032	0.243811	0.903077	0.903077	SUPV3L1/GPR50/METTL14	3
GO:0044270	cellular nitrogen compound catabolic process	3/59	59/2032	0.243811	0.903077	0.903077	SUPV3L1/GPR50/METTL14	3
GO:0098542	defense response to other organism	3/59	59/2032	0.243811	0.903077	0.903077	AvBD13/AVD/MX1	3
GO:1901361	organic cyclic compound catabolic process	3/59	60/2032	0.25171	0.903077	0.903077	SUPV3L1/GPR50/METTL14	3
GO:1901615	organic hydroxy compound metabolic process	3/59	60/2032	0.25171	0.903077	0.903077	MSMO1/TGFB2/LCAT	3
GO:0030334	regulation of cell migration	3/59	62/2032	0.267624	0.903077	0.903077	TGFB2/ARF6/SINHCAF	3
GO:0016049	cell growth	3/59	63/2032	0.275631	0.903077	0.903077	SUPV3L1/TGFB2/EAF2	3
GO:0007389	pattern specification process	3/59	65/2032	0.291722	0.903077	0.903077	TGFB2/C1H2ORF49/HOXB4	3
GO:0033365	protein localization to organelle	3/59	66/2032	0.299798	0.903077	0.903077	SPCS3/ARF6/NDC80	3
GO:2000145	regulation of cell motility	3/59	66/2032	0.299798	0.903077	0.903077	TGFB2/ARF6/SINHCAF	3
GO:0090407	organophosphate biosynthetic process	3/59	69/2032	0.324102	0.903077	0.903077	TK1/GPR50/MBOAT2	3
GO:0040012	regulation of locomotion	3/59	70/2032	0.332216	0.903077	0.903077	TGFB2/ARF6/SINHCAF	3
GO:0051270	regulation of cellular component movement	3/59	70/2032	0.332216	0.903077	0.903077	TGFB2/ARF6/SINHCAF	3
GO:0007017	microtubule-based process	3/59	71/2032	0.34033	0.903077	0.903077	HOOK1/STMN1/NDC80	3
GO:0044255	cellular lipid metabolic process	3/59	73/2032	0.356546	0.903077	0.903077	MTMR8/LCAT/MBOAT2	3
GO:0002684	positive regulation of immune system process	3/59	75/2032	0.372721	0.903077	0.903077	TGFB2/MBL2/MYO1G	3
GO:0006886	intracellular protein transport	3/59	79/2032	0.404856	0.903077	0.903077	SEC23B/SPCS3/ARF6	3
GO:0006753	nucleoside phosphate metabolic process	3/59	82/2032	0.428677	0.903077	0.903077	TK1/GPR50/NT5C3B	3
GO:0040008	regulation of growth	3/59	82/2032	0.428677	0.903077	0.903077	SUPV3L1/TGFB2/EAF2	3
GO:0048729	tissue morphogenesis	3/59	83/2032	0.436551	0.903077	0.903077	TGFB2/C1H2ORF49/HOXB4	3
GO:0032990	cell part morphogenesis	3/59	84/2032	0.444387	0.903077	0.903077	NEO1/SUPV3L1/FAM206A	3
GO:0044087	regulation of cellular component biogenesis	3/59	86/2032	0.459939	0.903077	0.903077	SEC23B/ARF6/FAM206A	3
GO:0055086	nucleobase-containing small molecule metabolic process	3/59	86/2032	0.459939	0.903077	0.903077	TK1/GPR50/NT5C3B	3
GO:0071363	cellular response to growth factor stimulus	3/59	87/2032	0.46765	0.903077	0.903077	NEO1/TGFB2/HSP90AB1	3
GO:0001501	skeletal system development	3/59	89/2032	0.482932	0.903077	0.903077	TGFB2/HOXB4/MGP	3
GO:1901137	carbohydrate derivative biosynthetic process	3/59	89/2032	0.482932	0.903077	0.903077	GPR50/C1GALT1/LARGE2	3
GO:0070848	response to growth factor	3/59	90/2032	0.4905	0.903077	0.903077	NEO1/TGFB2/HSP90AB1	3
GO:0032269	negative regulation of cellular protein metabolic process	3/59	91/2032	0.498017	0.903491	0.903491	DNAJC3/HSP90AB1/METTL14	3
GO:0006412	translation	3/59	93/2032	0.512891	0.903491	0.903491	DNAJC3/EARS2/METTL14	3
GO:0043043	peptide biosynthetic process	3/59	94/2032	0.520244	0.903491	0.903491	DNAJC3/EARS2/METTL14	3
GO:0051248	negative regulation of protein metabolic process	3/59	94/2032	0.520244	0.903491	0.903491	DNAJC3/HSP90AB1/METTL14	3
GO:0051301	cell division	3/59	95/2032	0.527541	0.903491	0.903491	TGFB2/HOXB4/NDC80	3
GO:0017144	drug metabolic process	3/59	96/2032	0.534779	0.903491	0.903491	CYP1A2/GPR50/TGFB2	3
GO:0044265	cellular macromolecule catabolic process	3/59	96/2032	0.534779	0.903491	0.903491	SUPV3L1/HSP90AB1/METTL14	3
GO:0000003	reproduction	3/59	98/2032	0.549074	0.905708	0.905708	TGFB2/EAF2/METTL14	3
GO:0022414	reproductive process	3/59	98/2032	0.549074	0.905708	0.905708	TGFB2/EAF2/METTL14	3
GO:0002682	regulation of immune system process	3/59	101/2032	0.570049	0.905708	0.905708	TGFB2/MBL2/MYO1G	3
GO:0019752	carboxylic acid metabolic process	3/59	101/2032	0.570049	0.905708	0.905708	GPR50/ODC1/EARS2	3
GO:0051241	negative regulation of multicellular organismal process	3/59	101/2032	0.570049	0.905708	0.905708	TGFB2/HSP90AB1/EAF2	3
GO:0043436	oxoacid metabolic process	3/59	104/2032	0.590439	0.905708	0.905708	GPR50/ODC1/EARS2	3
GO:0006082	organic acid metabolic process	3/59	105/2032	0.597102	0.905708	0.905708	GPR50/ODC1/EARS2	3
GO:0035295	tube development	3/59	105/2032	0.597102	0.905708	0.905708	TGFB2/C1GALT1/GJC1	3
GO:0051726	regulation of cell cycle	3/59	105/2032	0.597102	0.905708	0.905708	TGFB2/HSP90AB1/NDC80	3
GO:0043604	amide biosynthetic process	3/59	109/2032	0.623068	0.911535	0.911535	DNAJC3/EARS2/METTL14	3
GO:0009628	response to abiotic stimulus	3/59	112/2032	0.641808	0.921644	0.921644	TGFB2/SUV39H2/DNAJC3	3
GO:0009790	embryo development	3/59	115/2032	0.659909	0.922787	0.922787	TGFB2/C1H2ORF49/HOXB4	3
GO:0072359	circulatory system development	3/59	115/2032	0.659909	0.922787	0.922787	TGFB2/C1GALT1/GJC1	3
GO:0009057	macromolecule catabolic process	3/59	118/2032	0.677364	0.922787	0.922787	SUPV3L1/HSP90AB1/METTL14	3
GO:0040007	growth	3/59	125/2032	0.715578	0.935548	0.935548	SUPV3L1/TGFB2/EAF2	3
GO:1901700	response to oxygen-containing compound	3/59	128/2032	0.730884	0.935548	0.935548	TGFB2/HMGN3/VSNL1	3
GO:0007167	enzyme linked receptor protein signaling pathway	3/59	130/2032	0.740735	0.935548	0.935548	NEO1/TGFB2/HSP90AB1	3
GO:0048646	anatomical structure formation involved in morphogenesis	3/59	133/2032	0.754989	0.935548	0.935548	TGFB2/C1GALT1/C1H2ORF49	3
GO:0022402	cell cycle process	3/59	134/2032	0.759602	0.935548	0.935548	TGFB2/HSP90AB1/NDC80	3
GO:0006508	proteolysis	3/59	140/2032	0.785865	0.935548	0.935548	SPCS3/METAP1/HSP90AB1	3
GO:0044093	positive regulation of molecular function	3/59	141/2032	0.79001	0.93656	0.93656	SEC23B/TGFB2/HMGN3	3
GO:0006259	DNA metabolic process	3/59	143/2032	0.798107	0.936594	0.936594	SUPV3L1/TK1/SSRP1	3
GO:0042981	regulation of apoptotic process	3/59	144/2032	0.802059	0.936594	0.936594	SUPV3L1/TGFB2/C1H2ORF49	3
GO:0043067	regulation of programmed cell death	3/59	146/2032	0.809774	0.936594	0.936594	SUPV3L1/TGFB2/C1H2ORF49	3
GO:0009967	positive regulation of signal transduction	3/59	151/2032	0.827987	0.936594	0.936594	NEO1/TGFB2/HSP90AB1	3
GO:0048585	negative regulation of response to stimulus	3/59	152/2032	0.831451	0.936594	0.936594	TGFB2/DNAJC3/BMT2	3
GO:0010941	regulation of cell death	3/59	155/2032	0.841493	0.936594	0.936594	SUPV3L1/TGFB2/C1H2ORF49	3
GO:0071495	cellular response to endogenous stimulus	3/59	155/2032	0.841493	0.936594	0.936594	NEO1/TGFB2/HSP90AB1	3
GO:0018193	peptidyl-amino acid modification	3/59	157/2032	0.847904	0.936594	0.936594	SUV39H2/EGR1/DOHH	3
GO:0042127	regulation of cell proliferation	3/59	160/2032	0.857109	0.941101	0.941101	TGFB2/EAF2/SINHCAF	3
GO:0042325	regulation of phosphorylation	3/59	164/2032	0.868642	0.945328	0.945328	GPR50/TGFB2/DNAJC3	3
GO:2000113	negative regulation of cellular macromolecule biosynthetic process	3/59	164/2032	0.868642	0.945328	0.945328	SUV39H2/HOXB4/METTL14	3
GO:0045934	negative regulation of nucleobase-containing compound metabolic process	3/59	165/2032	0.871397	0.945892	0.945892	GPR50/SUV39H2/HOXB4	3
GO:0010558	negative regulation of macromolecule biosynthetic process	3/59	169/2032	0.881926	0.951967	0.951967	SUV39H2/HOXB4/METTL14	3
GO:1902531	regulation of intracellular signal transduction	3/59	171/2032	0.886905	0.955204	0.955204	TGFB2/ARF6/BMT2	3
GO:0009719	response to endogenous stimulus	3/59	180/2032	0.907111	0.96215	0.96215	NEO1/TGFB2/HSP90AB1	3
GO:0003008	system process	3/59	181/2032	0.909147	0.96215	0.96215	TGFB2/GJC1/MBP	3
GO:0019220	regulation of phosphate metabolic process	3/59	188/2032	0.922326	0.96215	0.96215	GPR50/TGFB2/DNAJC3	3
GO:0051174	regulation of phosphorus metabolic process	3/59	188/2032	0.922326	0.96215	0.96215	GPR50/TGFB2/DNAJC3	3
GO:0031399	regulation of protein modification process	3/59	193/2032	0.930667	0.964544	0.964544	TGFB2/DNAJC3/EGR1	3
GO:2000026	regulation of multicellular organismal development	3/59	199/2032	0.939609	0.967687	0.967687	TGFB2/ARF6/EAF2	3
GO:0050790	regulation of catalytic activity	3/59	215/2032	0.958588	0.972699	0.972699	SEC23B/TGFB2/DNAJC3	3
GO:0035556	intracellular signal transduction	3/59	254/2032	0.9843	0.986025	0.986025	TGFB2/ARF6/BMT2	3
GO:0006493	protein O-linked glycosylation	2/59	10/2032	0.0321129	0.903077	0.903077	C1GALT1/LARGE2	2
GO:0008016	regulation of heart contraction	2/59	10/2032	0.0321129	0.903077	0.903077	TGFB2/GJC1	2
GO:0008645	hexose transmembrane transport	2/59	10/2032	0.0321129	0.903077	0.903077	GPR50/SLC2A2	2
GO:0015749	monosaccharide transmembrane transport	2/59	10/2032	0.0321129	0.903077	0.903077	GPR50/SLC2A2	2
GO:0034219	carbohydrate transmembrane transport	2/59	10/2032	0.0321129	0.903077	0.903077	GPR50/SLC2A2	2
GO:0046847	filopodium assembly	2/59	10/2032	0.0321129	0.903077	0.903077	ARF6/FAM206A	2
GO:0051489	regulation of filopodium assembly	2/59	10/2032	0.0321129	0.903077	0.903077	ARF6/FAM206A	2
GO:1904659	glucose transmembrane transport	2/59	10/2032	0.0321129	0.903077	0.903077	GPR50/SLC2A2	2
GO:0050796	regulation of insulin secretion	2/59	11/2032	0.0385265	0.903077	0.903077	HMGN3/VSNL1	2
GO:0030258	lipid modification	2/59	12/2032	0.0453825	0.903077	0.903077	MTMR8/LCAT	2
GO:0050680	negative regulation of epithelial cell proliferation	2/59	12/2032	0.0453825	0.903077	0.903077	TGFB2/EAF2	2
GO:1903522	regulation of blood circulation	2/59	12/2032	0.0453825	0.903077	0.903077	TGFB2/GJC1	2
GO:0001889	liver development	2/59	13/2032	0.0526507	0.903077	0.903077	HNF1A/ARF6	2
GO:0007050	cell cycle arrest	2/59	13/2032	0.0526507	0.903077	0.903077	TGFB2/HSP90AB1	2
GO:0008643	carbohydrate transport	2/59	13/2032	0.0526507	0.903077	0.903077	GPR50/SLC2A2	2
GO:0061008	hepaticobiliary system development	2/59	13/2032	0.0526507	0.903077	0.903077	HNF1A/ARF6	2
GO:0001818	negative regulation of cytokine production	2/59	14/2032	0.0603023	0.903077	0.903077	TGFB2/HSP90AB1	2
GO:0010634	positive regulation of epithelial cell migration	2/59	14/2032	0.0603023	0.903077	0.903077	TGFB2/ARF6	2
GO:0002449	lymphocyte mediated immunity	2/59	15/2032	0.0683098	0.903077	0.903077	MBL2/MYO1G	2
GO:0002460	adaptive immune response based on somatic recombination of immune receptors built from immunoglobulin superfamily domains	2/59	15/2032	0.0683098	0.903077	0.903077	MBL2/MYO1G	2
GO:0048565	digestive tract development	2/59	15/2032	0.0683098	0.903077	0.903077	TGFB2/C1GALT1	2
GO:0060491	regulation of cell projection assembly	2/59	15/2032	0.0683098	0.903077	0.903077	ARF6/FAM206A	2
GO:0120032	regulation of plasma membrane bounded cell projection assembly	2/59	15/2032	0.0683098	0.903077	0.903077	ARF6/FAM206A	2
GO:0090276	regulation of peptide hormone secretion	2/59	16/2032	0.0766467	0.903077	0.903077	HMGN3/VSNL1	2
GO:0030010	establishment of cell polarity	2/59	17/2032	0.085288	0.903077	0.903077	ARF6/NDC80	2
GO:0050714	positive regulation of protein secretion	2/59	17/2032	0.085288	0.903077	0.903077	TGFB2/VSNL1	2
GO:0055123	digestive system development	2/59	17/2032	0.085288	0.903077	0.903077	TGFB2/C1GALT1	2
GO:0008360	regulation of cell shape	2/59	18/2032	0.0942097	0.903077	0.903077	FN1/SEC23B	2
GO:0010632	regulation of epithelial cell migration	2/59	18/2032	0.0942097	0.903077	0.903077	TGFB2/ARF6	2
GO:0030307	positive regulation of cell growth	2/59	18/2032	0.0942097	0.903077	0.903077	SUPV3L1/TGFB2	2
GO:0007043	cell-cell junction assembly	2/59	19/2032	0.103389	0.903077	0.903077	CDH3/GJC1	2
GO:0001666	response to hypoxia	2/59	20/2032	0.112804	0.903077	0.903077	TGFB2/SUV39H2	2
GO:0002793	positive regulation of peptide secretion	2/59	20/2032	0.112804	0.903077	0.903077	TGFB2/VSNL1	2
GO:0006399	tRNA metabolic process	2/59	20/2032	0.112804	0.903077	0.903077	METTL2A/EARS2	2
GO:0016125	sterol metabolic process	2/59	20/2032	0.112804	0.903077	0.903077	MSMO1/LCAT	2
GO:0036293	response to decreased oxygen levels	2/59	20/2032	0.112804	0.903077	0.903077	TGFB2/SUV39H2	2
GO:0050900	leukocyte migration	2/59	20/2032	0.112804	0.903077	0.903077	TGFB2/MYO1G	2
GO:0051604	protein maturation	2/59	20/2032	0.112804	0.903077	0.903077	SPCS3/DOHH	2
GO:0002443	leukocyte mediated immunity	2/59	21/2032	0.122433	0.903077	0.903077	MBL2/MYO1G	2
GO:0006959	humoral immune response	2/59	21/2032	0.122433	0.903077	0.903077	AVD/MBL2	2
GO:0016358	dendrite development	2/59	21/2032	0.122433	0.903077	0.903077	ARF6/FAM206A	2
GO:0030041	actin filament polymerization	2/59	21/2032	0.122433	0.903077	0.903077	ARF6/FAM206A	2
GO:0030833	regulation of actin filament polymerization	2/59	21/2032	0.122433	0.903077	0.903077	ARF6/FAM206A	2
GO:0070482	response to oxygen levels	2/59	21/2032	0.122433	0.903077	0.903077	TGFB2/SUV39H2	2
GO:0007163	establishment or maintenance of cell polarity	2/59	22/2032	0.132257	0.903077	0.903077	ARF6/NDC80	2
GO:0030308	negative regulation of cell growth	2/59	23/2032	0.142258	0.903077	0.903077	TGFB2/EAF2	2
GO:0031330	negative regulation of cellular catabolic process	2/59	23/2032	0.142258	0.903077	0.903077	GPR50/HSP90AB1	2
GO:0006402	mRNA catabolic process	2/59	24/2032	0.152416	0.903077	0.903077	SUPV3L1/METTL14	2
GO:0006650	glycerophospholipid metabolic process	2/59	24/2032	0.152416	0.903077	0.903077	MTMR8/LCAT	2
GO:0007179	transforming growth factor beta receptor signaling pathway	2/59	24/2032	0.152416	0.903077	0.903077	TGFB2/HSP90AB1	2
GO:0010948	negative regulation of cell cycle process	2/59	24/2032	0.152416	0.903077	0.903077	HSP90AB1/NDC80	2
GO:1903829	positive regulation of cellular protein localization	2/59	24/2032	0.152416	0.903077	0.903077	ARF6/NDC80	2
GO:0002250	adaptive immune response	2/59	25/2032	0.162715	0.903077	0.903077	MBL2/MYO1G	2
GO:0008064	regulation of actin polymerization or depolymerization	2/59	25/2032	0.162715	0.903077	0.903077	ARF6/FAM206A	2
GO:0008154	actin polymerization or depolymerization	2/59	25/2032	0.162715	0.903077	0.903077	ARF6/FAM206A	2
GO:0009615	response to virus	2/59	25/2032	0.162715	0.903077	0.903077	TGFB2/MX1	2
GO:0009895	negative regulation of catabolic process	2/59	25/2032	0.162715	0.903077	0.903077	GPR50/HSP90AB1	2
GO:0010631	epithelial cell migration	2/59	25/2032	0.162715	0.903077	0.903077	TGFB2/ARF6	2
GO:0030832	regulation of actin filament length	2/59	25/2032	0.162715	0.903077	0.903077	ARF6/FAM206A	2
GO:0032271	regulation of protein polymerization	2/59	25/2032	0.162715	0.903077	0.903077	ARF6/FAM206A	2
GO:0031331	positive regulation of cellular catabolic process	2/59	26/2032	0.173138	0.903077	0.903077	SUPV3L1/METTL14	2
GO:0048738	cardiac muscle tissue development	2/59	26/2032	0.173138	0.903077	0.903077	TGFB2/GJC1	2
GO:0090132	epithelium migration	2/59	26/2032	0.173138	0.903077	0.903077	TGFB2/ARF6	2
GO:0008202	steroid metabolic process	2/59	27/2032	0.183671	0.903077	0.903077	MSMO1/LCAT	2
GO:0016050	vesicle organization	2/59	27/2032	0.183671	0.903077	0.903077	SEC23B/HOOK1	2
GO:0046883	regulation of hormone secretion	2/59	27/2032	0.183671	0.903077	0.903077	HMGN3/VSNL1	2
GO:0071559	response to transforming growth factor beta	2/59	27/2032	0.183671	0.903077	0.903077	TGFB2/HSP90AB1	2
GO:0071560	cellular response to transforming growth factor beta stimulus	2/59	27/2032	0.183671	0.903077	0.903077	TGFB2/HSP90AB1	2
GO:0006401	RNA catabolic process	2/59	28/2032	0.194297	0.903077	0.903077	SUPV3L1/METTL14	2
GO:0042063	gliogenesis	2/59	28/2032	0.194297	0.903077	0.903077	TGFB2/METTL14	2
GO:0045927	positive regulation of growth	2/59	28/2032	0.194297	0.903077	0.903077	SUPV3L1/TGFB2	2
GO:0051222	positive regulation of protein transport	2/59	28/2032	0.194297	0.903077	0.903077	TGFB2/VSNL1	2
GO:0090130	tissue migration	2/59	28/2032	0.194297	0.903077	0.903077	TGFB2/ARF6	2
GO:1904951	positive regulation of establishment of protein localization	2/59	28/2032	0.194297	0.903077	0.903077	TGFB2/VSNL1	2
GO:0001655	urogenital system development	2/59	29/2032	0.205004	0.903077	0.903077	C1GALT1/EAF2	2
GO:0006333	chromatin assembly or disassembly	2/59	29/2032	0.205004	0.903077	0.903077	SUV39H2/HIST1H2B5	2
GO:0034332	adherens junction organization	2/59	29/2032	0.205004	0.903077	0.903077	CDH3/ARF6	2
GO:0045926	negative regulation of growth	2/59	29/2032	0.205004	0.903077	0.903077	TGFB2/EAF2	2
GO:0050678	regulation of epithelial cell proliferation	2/59	29/2032	0.205004	0.903077	0.903077	TGFB2/EAF2	2
GO:0006486	protein glycosylation	2/59	30/2032	0.215778	0.903077	0.903077	C1GALT1/LARGE2	2
GO:0043413	macromolecule glycosylation	2/59	30/2032	0.215778	0.903077	0.903077	C1GALT1/LARGE2	2
GO:0070085	glycosylation	2/59	30/2032	0.215778	0.903077	0.903077	C1GALT1/LARGE2	2
GO:1901617	organic hydroxy compound biosynthetic process	2/59	30/2032	0.215778	0.903077	0.903077	MSMO1/TGFB2	2
GO:0046486	glycerolipid metabolic process	2/59	31/2032	0.226605	0.903077	0.903077	MTMR8/LCAT	2
GO:0048863	stem cell differentiation	2/59	31/2032	0.226605	0.903077	0.903077	TGFB2/HOXB4	2
GO:0060627	regulation of vesicle-mediated transport	2/59	31/2032	0.226605	0.903077	0.903077	SEC23B/VSNL1	2
GO:0090287	regulation of cellular response to growth factor stimulus	2/59	31/2032	0.226605	0.903077	0.903077	NEO1/HSP90AB1	2
GO:0007005	mitochondrion organization	2/59	32/2032	0.237475	0.903077	0.903077	SUPV3L1/MX1	2
GO:0009896	positive regulation of catabolic process	2/59	32/2032	0.237475	0.903077	0.903077	SUPV3L1/METTL14	2
GO:0110053	regulation of actin filament organization	2/59	32/2032	0.237475	0.903077	0.903077	ARF6/FAM206A	2
GO:0050673	epithelial cell proliferation	2/59	33/2032	0.248376	0.903077	0.903077	TGFB2/EAF2	2
GO:0002253	activation of immune response	2/59	34/2032	0.259297	0.903077	0.903077	MBL2/MYO1G	2
GO:0009124	nucleoside monophosphate biosynthetic process	2/59	34/2032	0.259297	0.903077	0.903077	TK1/GPR50	2
GO:0030031	cell projection assembly	2/59	34/2032	0.259297	0.903077	0.903077	ARF6/FAM206A	2
GO:0042326	negative regulation of phosphorylation	2/59	34/2032	0.259297	0.903077	0.903077	GPR50/DNAJC3	2
GO:0048608	reproductive structure development	2/59	34/2032	0.259297	0.903077	0.903077	TGFB2/EAF2	2
GO:0051051	negative regulation of transport	2/59	34/2032	0.259297	0.903077	0.903077	GPR50/VSNL1	2
GO:0061458	reproductive system development	2/59	34/2032	0.259297	0.903077	0.903077	TGFB2/EAF2	2
GO:0120031	plasma membrane bounded cell projection assembly	2/59	34/2032	0.259297	0.903077	0.903077	ARF6/FAM206A	2
GO:0034329	cell junction assembly	2/59	35/2032	0.270227	0.903077	0.903077	CDH3/GJC1	2
GO:0051047	positive regulation of secretion	2/59	35/2032	0.270227	0.903077	0.903077	TGFB2/VSNL1	2
GO:1903532	positive regulation of secretion by cell	2/59	35/2032	0.270227	0.903077	0.903077	TGFB2/VSNL1	2
GO:0032956	regulation of actin cytoskeleton organization	2/59	37/2032	0.292081	0.903077	0.903077	ARF6/FAM206A	2
GO:0042742	defense response to bacterium	2/59	38/2032	0.302986	0.903077	0.903077	AvBD13/AVD	2
GO:0006520	cellular amino acid metabolic process	2/59	39/2032	0.313865	0.903077	0.903077	ODC1/EARS2	2
GO:0032970	regulation of actin filament-based process	2/59	40/2032	0.324712	0.903077	0.903077	ARF6/FAM206A	2
GO:0034470	ncRNA processing	2/59	40/2032	0.324712	0.903077	0.903077	METTL2A/BMT2	2
GO:0043009	chordate embryonic development	2/59	40/2032	0.324712	0.903077	0.903077	TGFB2/HOXB4	2
GO:1902903	regulation of supramolecular fiber organization	2/59	40/2032	0.324712	0.903077	0.903077	ARF6/FAM206A	2
GO:0044057	regulation of system process	2/59	41/2032	0.335518	0.903077	0.903077	TGFB2/GJC1	2
GO:0006417	regulation of translation	2/59	42/2032	0.346278	0.903077	0.903077	DNAJC3/METTL14	2
GO:0009101	glycoprotein biosynthetic process	2/59	42/2032	0.346278	0.903077	0.903077	C1GALT1/LARGE2	2
GO:0030335	positive regulation of cell migration	2/59	42/2032	0.346278	0.903077	0.903077	TGFB2/ARF6	2
GO:0001667	ameboidal-type cell migration	2/59	43/2032	0.356984	0.903077	0.903077	TGFB2/ARF6	2
GO:0006914	autophagy	2/59	43/2032	0.356984	0.903077	0.903077	MTMR8/SEC23B	2
GO:0061919	process utilizing autophagic mechanism	2/59	43/2032	0.356984	0.903077	0.903077	MTMR8/SEC23B	2
GO:0065004	protein-DNA complex assembly	2/59	43/2032	0.356984	0.903077	0.903077	CENPO/HIST1H2B5	2
GO:0008610	lipid biosynthetic process	2/59	44/2032	0.367631	0.903077	0.903077	MSMO1/MBOAT2	2
GO:2000147	positive regulation of cell motility	2/59	44/2032	0.367631	0.903077	0.903077	TGFB2/ARF6	2
GO:0001817	regulation of cytokine production	2/59	45/2032	0.378213	0.903077	0.903077	TGFB2/HSP90AB1	2
GO:0032535	regulation of cellular component size	2/59	45/2032	0.378213	0.903077	0.903077	ARF6/FAM206A	2
GO:0034248	regulation of cellular amide metabolic process	2/59	45/2032	0.378213	0.903077	0.903077	DNAJC3/METTL14	2
GO:0051272	positive regulation of cellular component movement	2/59	45/2032	0.378213	0.903077	0.903077	TGFB2/ARF6	2
GO:0001503	ossification	2/59	46/2032	0.388725	0.903077	0.903077	TGFB2/MGP	2
GO:0009100	glycoprotein metabolic process	2/59	46/2032	0.388725	0.903077	0.903077	C1GALT1/LARGE2	2
GO:0051656	establishment of organelle localization	2/59	46/2032	0.388725	0.903077	0.903077	SEC23B/NDC80	2
GO:0014706	striated muscle tissue development	2/59	47/2032	0.399162	0.903077	0.903077	TGFB2/GJC1	2
GO:0040017	positive regulation of locomotion	2/59	47/2032	0.399162	0.903077	0.903077	TGFB2/ARF6	2
GO:0071824	protein-DNA complex subunit organization	2/59	48/2032	0.40952	0.903077	0.903077	CENPO/HIST1H2B5	2
GO:0009792	embryo development ending in birth or egg hatching	2/59	49/2032	0.419795	0.903077	0.903077	TGFB2/HOXB4	2
GO:0060537	muscle tissue development	2/59	49/2032	0.419795	0.903077	0.903077	TGFB2/GJC1	2
GO:0045087	innate immune response	2/59	50/2032	0.429982	0.903077	0.903077	MBL2/MX1	2
GO:0001816	cytokine production	2/59	51/2032	0.440078	0.903077	0.903077	TGFB2/HSP90AB1	2
GO:0003006	developmental process involved in reproduction	2/59	51/2032	0.440078	0.903077	0.903077	TGFB2/EAF2	2
GO:0051216	cartilage development	2/59	51/2032	0.440078	0.903077	0.903077	TGFB2/MGP	2
GO:0071103	DNA conformation change	2/59	51/2032	0.440078	0.903077	0.903077	SUPV3L1/HIST1H2B5	2
GO:1901293	nucleoside phosphate biosynthetic process	2/59	51/2032	0.440078	0.903077	0.903077	TK1/GPR50	2
GO:0002009	morphogenesis of an epithelium	2/59	52/2032	0.450079	0.903077	0.903077	C1H2ORF49/HOXB4	2
GO:0009123	nucleoside monophosphate metabolic process	2/59	52/2032	0.450079	0.903077	0.903077	TK1/GPR50	2
GO:0010608	posttranscriptional regulation of gene expression	2/59	52/2032	0.450079	0.903077	0.903077	DNAJC3/METTL14	2
GO:0022604	regulation of cell morphogenesis	2/59	54/2032	0.469787	0.903077	0.903077	FN1/SEC23B	2
GO:0061448	connective tissue development	2/59	54/2032	0.469787	0.903077	0.903077	TGFB2/MGP	2
GO:0090066	regulation of anatomical structure size	2/59	54/2032	0.469787	0.903077	0.903077	ARF6/FAM206A	2
GO:0007015	actin filament organization	2/59	55/2032	0.479488	0.903077	0.903077	ARF6/FAM206A	2
GO:0009617	response to bacterium	2/59	55/2032	0.479488	0.903077	0.903077	AvBD13/AVD	2
GO:0098657	import into cell	2/59	56/2032	0.489084	0.903077	0.903077	MYO1G/SLC7A2	2
GO:0048514	blood vessel morphogenesis	2/59	58/2032	0.507952	0.903491	0.903491	C1GALT1/GJC1	2
GO:0051640	organelle localization	2/59	58/2032	0.507952	0.903491	0.903491	SEC23B/NDC80	2
GO:0080135	regulation of cellular response to stress	2/59	59/2032	0.51722	0.903491	0.903491	TGFB2/DNAJC3	2
GO:0016570	histone modification	2/59	60/2032	0.526375	0.903491	0.903491	SUV39H2/HDAC1	2
GO:0048285	organelle fission	2/59	60/2032	0.526375	0.903491	0.903491	NDC80/MX1	2
GO:0007600	sensory perception	2/59	61/2032	0.535417	0.903491	0.903491	GJC1/MBP	2
GO:0016569	covalent chromatin modification	2/59	61/2032	0.535417	0.903491	0.903491	SUV39H2/HDAC1	2
GO:0048568	embryonic organ development	2/59	62/2032	0.544343	0.905708	0.905708	TGFB2/HOXB4	2
GO:0007507	heart development	2/59	63/2032	0.553154	0.905708	0.905708	TGFB2/GJC1	2
GO:0001568	blood vessel development	2/59	64/2032	0.561847	0.905708	0.905708	C1GALT1/GJC1	2
GO:0010564	regulation of cell cycle process	2/59	66/2032	0.578879	0.905708	0.905708	HSP90AB1/NDC80	2
GO:0006935	chemotaxis	2/59	67/2032	0.587217	0.905708	0.905708	NEO1/TGFB2	2
GO:0008285	negative regulation of cell proliferation	2/59	67/2032	0.587217	0.905708	0.905708	TGFB2/EAF2	2
GO:0042330	taxis	2/59	67/2032	0.587217	0.905708	0.905708	NEO1/TGFB2	2
GO:0031344	regulation of cell projection organization	2/59	68/2032	0.595436	0.905708	0.905708	ARF6/FAM206A	2
GO:0120035	regulation of plasma membrane bounded cell projection organization	2/59	68/2032	0.595436	0.905708	0.905708	ARF6/FAM206A	2
GO:0001944	vasculature development	2/59	69/2032	0.603536	0.905773	0.905773	C1GALT1/GJC1	2
GO:0051050	positive regulation of transport	2/59	69/2032	0.603536	0.905773	0.905773	TGFB2/VSNL1	2
GO:0030097	hemopoiesis	2/59	71/2032	0.619376	0.911535	0.911535	TGFB2/HOXB4	2
GO:0072358	cardiovascular system development	2/59	71/2032	0.619376	0.911535	0.911535	C1GALT1/GJC1	2
GO:0043086	negative regulation of catalytic activity	2/59	72/2032	0.627117	0.912772	0.912772	TGFB2/DNAJC3	2
GO:0055082	cellular chemical homeostasis	2/59	75/2032	0.649626	0.922787	0.922787	HMGN3/VSNL1	2
GO:0045859	regulation of protein kinase activity	2/59	77/2032	0.66404	0.922787	0.922787	TGFB2/DNAJC3	2
GO:0048534	hematopoietic or lymphoid organ development	2/59	77/2032	0.66404	0.922787	0.922787	TGFB2/HOXB4	2
GO:0048667	cell morphogenesis involved in neuron differentiation	2/59	77/2032	0.66404	0.922787	0.922787	NEO1/FAM206A	2
GO:0016071	mRNA metabolic process	2/59	78/2032	0.671071	0.922787	0.922787	SUPV3L1/METTL14	2
GO:0035239	tube morphogenesis	2/59	79/2032	0.677986	0.922787	0.922787	C1GALT1/GJC1	2
GO:0009117	nucleotide metabolic process	2/59	81/2032	0.691469	0.926722	0.926722	GPR50/NT5C3B	2
GO:0043549	regulation of kinase activity	2/59	81/2032	0.691469	0.926722	0.926722	TGFB2/DNAJC3	2
GO:0048812	neuron projection morphogenesis	2/59	81/2032	0.691469	0.926722	0.926722	NEO1/FAM206A	2
GO:0048858	cell projection morphogenesis	2/59	82/2032	0.698038	0.926722	0.926722	NEO1/FAM206A	2
GO:0120039	plasma membrane bounded cell projection morphogenesis	2/59	82/2032	0.698038	0.926722	0.926722	NEO1/FAM206A	2
GO:0048598	embryonic morphogenesis	2/59	83/2032	0.704495	0.930494	0.930494	C1H2ORF49/HOXB4	2
GO:0002520	immune system development	2/59	86/2032	0.723194	0.935548	0.935548	TGFB2/HOXB4	2
GO:1901701	cellular response to oxygen-containing compound	2/59	88/2032	0.735111	0.935548	0.935548	HMGN3/VSNL1	2
GO:0030036	actin cytoskeleton organization	2/59	89/2032	0.740908	0.935548	0.935548	ARF6/FAM206A	2
GO:0051338	regulation of transferase activity	2/59	89/2032	0.740908	0.935548	0.935548	TGFB2/DNAJC3	2
GO:0051093	negative regulation of developmental process	2/59	90/2032	0.746599	0.935548	0.935548	EAF2/SINHCAF	2
GO:0019725	cellular homeostasis	2/59	91/2032	0.752186	0.935548	0.935548	HMGN3/VSNL1	2
GO:0044092	negative regulation of molecular function	2/59	91/2032	0.752186	0.935548	0.935548	TGFB2/DNAJC3	2
GO:0000122	negative regulation of transcription by RNA polymerase II	2/59	92/2032	0.757668	0.935548	0.935548	SUV39H2/HOXB4	2
GO:0030029	actin filament-based process	2/59	94/2032	0.768326	0.935548	0.935548	ARF6/FAM206A	2
GO:0008284	positive regulation of cell proliferation	2/59	95/2032	0.773504	0.935548	0.935548	TGFB2/SINHCAF	2
GO:0042493	response to drug	2/59	95/2032	0.773504	0.935548	0.935548	TGFB2/SLC7A2	2
GO:0000904	cell morphogenesis involved in differentiation	2/59	96/2032	0.778583	0.935548	0.935548	NEO1/FAM206A	2
GO:0022603	regulation of anatomical structure morphogenesis	2/59	97/2032	0.783565	0.935548	0.935548	FN1/SEC23B	2
GO:0050877	nervous system process	2/59	101/2032	0.80254	0.936594	0.936594	GJC1/MBP	2
GO:0045597	positive regulation of cell differentiation	2/59	110/2032	0.840027	0.936594	0.936594	TGFB2/HOXB4	2
GO:0080134	regulation of response to stress	2/59	110/2032	0.840027	0.936594	0.936594	TGFB2/DNAJC3	2
GO:0043085	positive regulation of catalytic activity	2/59	111/2032	0.843777	0.936594	0.936594	SEC23B/TGFB2	2
GO:0051336	regulation of hydrolase activity	2/59	111/2032	0.843777	0.936594	0.936594	SEC23B/TGFB2	2
GO:0034220	ion transmembrane transport	2/59	112/2032	0.847449	0.936594	0.936594	GJC1/SLC7A2	2
GO:0051130	positive regulation of cellular component organization	2/59	117/2032	0.864681	0.945328	0.945328	TGFB2/ARF6	2
GO:0010648	negative regulation of cell communication	2/59	133/2032	0.908689	0.96215	0.96215	BMT2/VSNL1	2
GO:0023057	negative regulation of signaling	2/59	133/2032	0.908689	0.96215	0.96215	BMT2/VSNL1	2
GO:0009887	animal organ morphogenesis	2/59	137/2032	0.917421	0.96215	0.96215	TGFB2/HOXB4	2
GO:0045892	negative regulation of transcription, DNA-templated	2/59	139/2032	0.921492	0.96215	0.96215	SUV39H2/HOXB4	2
GO:0051094	positive regulation of developmental process	2/59	142/2032	0.927253	0.96215	0.96215	TGFB2/HOXB4	2
GO:1902679	negative regulation of RNA biosynthetic process	2/59	142/2032	0.927253	0.96215	0.96215	SUV39H2/HOXB4	2
GO:1903507	negative regulation of nucleic acid-templated transcription	2/59	142/2032	0.927253	0.96215	0.96215	SUV39H2/HOXB4	2
GO:0051253	negative regulation of RNA metabolic process	2/59	151/2032	0.942273	0.968364	0.968364	SUV39H2/HOXB4	2
GO:0006811	ion transport	2/59	155/2032	0.947975	0.971463	0.971463	GJC1/SLC7A2	2
GO:0001932	regulation of protein phosphorylation	2/59	156/2032	0.949316	0.971463	0.971463	TGFB2/DNAJC3	2
GO:0032270	positive regulation of cellular protein metabolic process	2/59	157/2032	0.950624	0.971771	0.971771	TGFB2/DNAJC3	2
GO:0051240	positive regulation of multicellular organismal process	2/59	163/2032	0.957835	0.972699	0.972699	TGFB2/ARF6	2
GO:0051247	positive regulation of protein metabolic process	2/59	167/2032	0.962079	0.973172	0.973172	TGFB2/DNAJC3	2
GO:0006468	protein phosphorylation	2/59	201/2032	0.985004	0.986025	0.986025	TGFB2/DNAJC3	2
GO:0003197	endocardial cushion development	1/59	10/2032	0.255705	0.903077	0.903077	TGFB2	1
GO:0006476	protein deacetylation	1/59	10/2032	0.255705	0.903077	0.903077	HDAC1	1
GO:0007272	ensheathment of neurons	1/59	10/2032	0.255705	0.903077	0.903077	MBP	1
GO:0008366	axon ensheathment	1/59	10/2032	0.255705	0.903077	0.903077	MBP	1
GO:0030199	collagen fibril organization	1/59	10/2032	0.255705	0.903077	0.903077	TGFB2	1
GO:0031016	pancreas development	1/59	10/2032	0.255705	0.903077	0.903077	HNF1A	1
GO:0034250	positive regulation of cellular amide metabolic process	1/59	10/2032	0.255705	0.903077	0.903077	DNAJC3	1
GO:0042552	myelination	1/59	10/2032	0.255705	0.903077	0.903077	MBP	1
GO:0051383	kinetochore organization	1/59	10/2032	0.255705	0.903077	0.903077	NDC80	1
GO:1903313	positive regulation of mRNA metabolic process	1/59	10/2032	0.255705	0.903077	0.903077	METTL14	1
GO:1903391	regulation of adherens junction organization	1/59	10/2032	0.255705	0.903077	0.903077	ARF6	1
GO:1904375	regulation of protein localization to cell periphery	1/59	10/2032	0.255705	0.903077	0.903077	ARF6	1
GO:0002526	acute inflammatory response	1/59	11/2032	0.277422	0.903077	0.903077	FN1	1
GO:0006986	response to unfolded protein	1/59	11/2032	0.277422	0.903077	0.903077	DNAJC3	1
GO:0007052	mitotic spindle organization	1/59	11/2032	0.277422	0.903077	0.903077	NDC80	1
GO:0014855	striated muscle cell proliferation	1/59	11/2032	0.277422	0.903077	0.903077	TGFB2	1
GO:0030838	positive regulation of actin filament polymerization	1/59	11/2032	0.277422	0.903077	0.903077	ARF6	1
GO:0032273	positive regulation of protein polymerization	1/59	11/2032	0.277422	0.903077	0.903077	ARF6	1
GO:0032434	regulation of proteasomal ubiquitin-dependent protein catabolic process	1/59	11/2032	0.277422	0.903077	0.903077	HSP90AB1	1
GO:0032874	positive regulation of stress-activated MAPK cascade	1/59	11/2032	0.277422	0.903077	0.903077	TGFB2	1
GO:0035305	negative regulation of dephosphorylation	1/59	11/2032	0.277422	0.903077	0.903077	TGFB2	1
GO:0042177	negative regulation of protein catabolic process	1/59	11/2032	0.277422	0.903077	0.903077	HSP90AB1	1
GO:0050773	regulation of dendrite development	1/59	11/2032	0.277422	0.903077	0.903077	ARF6	1
GO:0051224	negative regulation of protein transport	1/59	11/2032	0.277422	0.903077	0.903077	VSNL1	1
GO:0051983	regulation of chromosome segregation	1/59	11/2032	0.277422	0.903077	0.903077	NDC80	1
GO:0055072	iron ion homeostasis	1/59	11/2032	0.277422	0.903077	0.903077	NEO1	1
GO:0070304	positive regulation of stress-activated protein kinase signaling cascade	1/59	11/2032	0.277422	0.903077	0.903077	TGFB2	1
GO:0072132	mesenchyme morphogenesis	1/59	11/2032	0.277422	0.903077	0.903077	TGFB2	1
GO:0097529	myeloid leukocyte migration	1/59	11/2032	0.277422	0.903077	0.903077	TGFB2	1
GO:1904950	negative regulation of establishment of protein localization	1/59	11/2032	0.277422	0.903077	0.903077	VSNL1	1
GO:1905475	regulation of protein localization to membrane	1/59	11/2032	0.277422	0.903077	0.903077	ARF6	1
GO:0006909	phagocytosis	1/59	12/2032	0.298517	0.903077	0.903077	MYO1G	1
GO:0010717	regulation of epithelial to mesenchymal transition	1/59	12/2032	0.298517	0.903077	0.903077	TGFB2	1
GO:0014068	positive regulation of phosphatidylinositol 3-kinase signaling	1/59	12/2032	0.298517	0.903077	0.903077	TGFB2	1
GO:0016339	calcium-dependent cell-cell adhesion via plasma membrane cell adhesion molecules	1/59	12/2032	0.298517	0.903077	0.903077	CDH3	1
GO:0016485	protein processing	1/59	12/2032	0.298517	0.903077	0.903077	SPCS3	1
GO:0021915	neural tube development	1/59	12/2032	0.298517	0.903077	0.903077	TGFB2	1
GO:0031109	microtubule polymerization or depolymerization	1/59	12/2032	0.298517	0.903077	0.903077	STMN1	1
GO:0034508	centromere complex assembly	1/59	12/2032	0.298517	0.903077	0.903077	CENPO	1
GO:0034968	histone lysine methylation	1/59	12/2032	0.298517	0.903077	0.903077	SUV39H2	1
GO:0043487	regulation of RNA stability	1/59	12/2032	0.298517	0.903077	0.903077	METTL14	1
GO:0043488	regulation of mRNA stability	1/59	12/2032	0.298517	0.903077	0.903077	METTL14	1
GO:0044331	cell-cell adhesion mediated by cadherin	1/59	12/2032	0.298517	0.903077	0.903077	CDH3	1
GO:0046488	phosphatidylinositol metabolic process	1/59	12/2032	0.298517	0.903077	0.903077	MTMR8	1
GO:0050000	chromosome localization	1/59	12/2032	0.298517	0.903077	0.903077	NDC80	1
GO:0051303	establishment of chromosome localization	1/59	12/2032	0.298517	0.903077	0.903077	NDC80	1
GO:0051304	chromosome separation	1/59	12/2032	0.298517	0.903077	0.903077	NDC80	1
GO:0060317	cardiac epithelial to mesenchymal transition	1/59	12/2032	0.298517	0.903077	0.903077	TGFB2	1
GO:0060996	dendritic spine development	1/59	12/2032	0.298517	0.903077	0.903077	ARF6	1
GO:0098739	import across plasma membrane	1/59	12/2032	0.298517	0.903077	0.903077	SLC7A2	1
GO:0002011	morphogenesis of an epithelial sheet	1/59	13/2032	0.319006	0.903077	0.903077	HOXB4	1
GO:0008033	tRNA processing	1/59	13/2032	0.319006	0.903077	0.903077	METTL2A	1
GO:0016571	histone methylation	1/59	13/2032	0.319006	0.903077	0.903077	SUV39H2	1
GO:0019730	antimicrobial humoral response	1/59	13/2032	0.319006	0.903077	0.903077	AVD	1
GO:0030595	leukocyte chemotaxis	1/59	13/2032	0.319006	0.903077	0.903077	TGFB2	1
GO:0032006	regulation of TOR signaling	1/59	13/2032	0.319006	0.903077	0.903077	BMT2	1
GO:0034976	response to endoplasmic reticulum stress	1/59	13/2032	0.319006	0.903077	0.903077	DNAJC3	1
GO:0035966	response to topologically incorrect protein	1/59	13/2032	0.319006	0.903077	0.903077	DNAJC3	1
GO:0051668	localization within membrane	1/59	13/2032	0.319006	0.903077	0.903077	SEC23B	1
GO:0060395	SMAD protein signal transduction	1/59	13/2032	0.319006	0.903077	0.903077	TGFB2	1
GO:0061013	regulation of mRNA catabolic process	1/59	13/2032	0.319006	0.903077	0.903077	METTL14	1
GO:0061053	somite development	1/59	13/2032	0.319006	0.903077	0.903077	TGFB2	1
GO:1903531	negative regulation of secretion by cell	1/59	13/2032	0.319006	0.903077	0.903077	VSNL1	1
GO:2000058	regulation of ubiquitin-dependent protein catabolic process	1/59	13/2032	0.319006	0.903077	0.903077	HSP90AB1	1
GO:2001251	negative regulation of chromosome organization	1/59	13/2032	0.319006	0.903077	0.903077	NDC80	1
GO:0001906	cell killing	1/59	14/2032	0.338906	0.903077	0.903077	TGFB2	1
GO:0002065	columnar/cuboidal epithelial cell differentiation	1/59	14/2032	0.338906	0.903077	0.903077	C1GALT1	1
GO:0002700	regulation of production of molecular mediator of immune response	1/59	14/2032	0.338906	0.903077	0.903077	TGFB2	1
GO:0006605	protein targeting	1/59	14/2032	0.338906	0.903077	0.903077	SPCS3	1
GO:0008544	epidermis development	1/59	14/2032	0.338906	0.903077	0.903077	TGFB2	1
GO:0010675	regulation of cellular carbohydrate metabolic process	1/59	14/2032	0.338906	0.903077	0.903077	GPR50	1
GO:0014066	regulation of phosphatidylinositol 3-kinase signaling	1/59	14/2032	0.338906	0.903077	0.903077	TGFB2	1
GO:0016482	cytosolic transport	1/59	14/2032	0.338906	0.903077	0.903077	HOOK1	1
GO:0018022	peptidyl-lysine methylation	1/59	14/2032	0.338906	0.903077	0.903077	SUV39H2	1
GO:0018958	phenol-containing compound metabolic process	1/59	14/2032	0.338906	0.903077	0.903077	TGFB2	1
GO:0035601	protein deacylation	1/59	14/2032	0.338906	0.903077	0.903077	HDAC1	1
GO:0045778	positive regulation of ossification	1/59	14/2032	0.338906	0.903077	0.903077	TGFB2	1
GO:0048813	dendrite morphogenesis	1/59	14/2032	0.338906	0.903077	0.903077	FAM206A	1
GO:0051048	negative regulation of secretion	1/59	14/2032	0.338906	0.903077	0.903077	VSNL1	1
GO:0061136	regulation of proteasomal protein catabolic process	1/59	14/2032	0.338906	0.903077	0.903077	HSP90AB1	1
GO:0098732	macromolecule deacylation	1/59	14/2032	0.338906	0.903077	0.903077	HDAC1	1
GO:1901991	negative regulation of mitotic cell cycle phase transition	1/59	14/2032	0.338906	0.903077	0.903077	NDC80	1
GO:1903828	negative regulation of cellular protein localization	1/59	14/2032	0.338906	0.903077	0.903077	ARF6	1
GO:0002429	immune response-activating cell surface receptor signaling pathway	1/59	15/2032	0.358234	0.903077	0.903077	MYO1G	1
GO:0006694	steroid biosynthetic process	1/59	15/2032	0.358234	0.903077	0.903077	MSMO1	1
GO:0007224	smoothened signaling pathway	1/59	15/2032	0.358234	0.903077	0.903077	PTCH1	1
GO:0008584	male gonad development	1/59	15/2032	0.358234	0.903077	0.903077	TGFB2	1
GO:0008654	phospholipid biosynthetic process	1/59	15/2032	0.358234	0.903077	0.903077	MBOAT2	1
GO:0009116	nucleoside metabolic process	1/59	15/2032	0.358234	0.903077	0.903077	TK1	1
GO:0010862	positive regulation of pathway-restricted SMAD protein phosphorylation	1/59	15/2032	0.358234	0.903077	0.903077	TGFB2	1
GO:0030336	negative regulation of cell migration	1/59	15/2032	0.358234	0.903077	0.903077	SINHCAF	1
GO:0030510	regulation of BMP signaling pathway	1/59	15/2032	0.358234	0.903077	0.903077	NEO1	1
GO:0030705	cytoskeleton-dependent intracellular transport	1/59	15/2032	0.358234	0.903077	0.903077	HOOK1	1
GO:0043588	skin development	1/59	15/2032	0.358234	0.903077	0.903077	TGFB2	1
GO:0046546	development of primary male sexual characteristics	1/59	15/2032	0.358234	0.903077	0.903077	TGFB2	1
GO:0055076	transition metal ion homeostasis	1/59	15/2032	0.358234	0.903077	0.903077	NEO1	1
GO:1903320	regulation of protein modification by small protein conjugation or removal	1/59	15/2032	0.358234	0.903077	0.903077	EGR1	1
GO:0002768	immune response-regulating cell surface receptor signaling pathway	1/59	16/2032	0.377007	0.903077	0.903077	MYO1G	1
GO:0006096	glycolytic process	1/59	16/2032	0.377007	0.903077	0.903077	GPR50	1
GO:0006109	regulation of carbohydrate metabolic process	1/59	16/2032	0.377007	0.903077	0.903077	GPR50	1
GO:0006757	ATP generation from ADP	1/59	16/2032	0.377007	0.903077	0.903077	GPR50	1
GO:0006888	ER to Golgi vesicle-mediated transport	1/59	16/2032	0.377007	0.903077	0.903077	SEC23B	1
GO:0007030	Golgi organization	1/59	16/2032	0.377007	0.903077	0.903077	SEC23B	1
GO:0007051	spindle organization	1/59	16/2032	0.377007	0.903077	0.903077	NDC80	1
GO:0007605	sensory perception of sound	1/59	16/2032	0.377007	0.903077	0.903077	MBP	1
GO:0008203	cholesterol metabolic process	1/59	16/2032	0.377007	0.903077	0.903077	LCAT	1
GO:0009267	cellular response to starvation	1/59	16/2032	0.377007	0.903077	0.903077	BMT2	1
GO:0014065	phosphatidylinositol 3-kinase signaling	1/59	16/2032	0.377007	0.903077	0.903077	TGFB2	1
GO:0017157	regulation of exocytosis	1/59	16/2032	0.377007	0.903077	0.903077	VSNL1	1
GO:0031929	TOR signaling	1/59	16/2032	0.377007	0.903077	0.903077	BMT2	1
GO:0032508	DNA duplex unwinding	1/59	16/2032	0.377007	0.903077	0.903077	SUPV3L1	1
GO:0035335	peptidyl-tyrosine dephosphorylation	1/59	16/2032	0.377007	0.903077	0.903077	MTMR8	1
GO:0042866	pyruvate biosynthetic process	1/59	16/2032	0.377007	0.903077	0.903077	GPR50	1
GO:0046661	male sex differentiation	1/59	16/2032	0.377007	0.903077	0.903077	TGFB2	1
GO:0048015	phosphatidylinositol-mediated signaling	1/59	16/2032	0.377007	0.903077	0.903077	TGFB2	1
GO:0048017	inositol lipid-mediated signaling	1/59	16/2032	0.377007	0.903077	0.903077	TGFB2	1
GO:0048704	embryonic skeletal system morphogenesis	1/59	16/2032	0.377007	0.903077	0.903077	HOXB4	1
GO:0050954	sensory perception of mechanical stimulus	1/59	16/2032	0.377007	0.903077	0.903077	MBP	1
GO:0051781	positive regulation of cell division	1/59	16/2032	0.377007	0.903077	0.903077	TGFB2	1
GO:0060393	regulation of pathway-restricted SMAD protein phosphorylation	1/59	16/2032	0.377007	0.903077	0.903077	TGFB2	1
GO:0061025	membrane fusion	1/59	16/2032	0.377007	0.903077	0.903077	MX1	1
GO:0098656	anion transmembrane transport	1/59	16/2032	0.377007	0.903077	0.903077	SLC7A2	1
GO:1902652	secondary alcohol metabolic process	1/59	16/2032	0.377007	0.903077	0.903077	LCAT	1
GO:1902850	microtubule cytoskeleton organization involved in mitosis	1/59	16/2032	0.377007	0.903077	0.903077	NDC80	1
GO:1903050	regulation of proteolysis involved in cellular protein catabolic process	1/59	16/2032	0.377007	0.903077	0.903077	HSP90AB1	1
GO:0002064	epithelial cell development	1/59	17/2032	0.395239	0.903077	0.903077	C1GALT1	1
GO:0006364	rRNA processing	1/59	17/2032	0.395239	0.903077	0.903077	BMT2	1
GO:0007034	vacuolar transport	1/59	17/2032	0.395239	0.903077	0.903077	HOOK1	1
GO:0007093	mitotic cell cycle checkpoint	1/59	17/2032	0.395239	0.903077	0.903077	NDC80	1
GO:0008585	female gonad development	1/59	17/2032	0.395239	0.903077	0.903077	TGFB2	1
GO:0010506	regulation of autophagy	1/59	17/2032	0.395239	0.903077	0.903077	MTMR8	1
GO:0015849	organic acid transport	1/59	17/2032	0.395239	0.903077	0.903077	SLC7A2	1
GO:0019359	nicotinamide nucleotide biosynthetic process	1/59	17/2032	0.395239	0.903077	0.903077	GPR50	1
GO:0019363	pyridine nucleotide biosynthetic process	1/59	17/2032	0.395239	0.903077	0.903077	GPR50	1
GO:0032872	regulation of stress-activated MAPK cascade	1/59	17/2032	0.395239	0.903077	0.903077	TGFB2	1
GO:0045931	positive regulation of mitotic cell cycle	1/59	17/2032	0.395239	0.903077	0.903077	NDC80	1
GO:0046545	development of primary female sexual characteristics	1/59	17/2032	0.395239	0.903077	0.903077	TGFB2	1
GO:0046887	positive regulation of hormone secretion	1/59	17/2032	0.395239	0.903077	0.903077	VSNL1	1
GO:0046942	carboxylic acid transport	1/59	17/2032	0.395239	0.903077	0.903077	SLC7A2	1
GO:0051262	protein tetramerization	1/59	17/2032	0.395239	0.903077	0.903077	TK1	1
GO:0060389	pathway-restricted SMAD protein phosphorylation	1/59	17/2032	0.395239	0.903077	0.903077	TGFB2	1
GO:0070302	regulation of stress-activated protein kinase signaling cascade	1/59	17/2032	0.395239	0.903077	0.903077	TGFB2	1
GO:0071695	anatomical structure maturation	1/59	17/2032	0.395239	0.903077	0.903077	TGFB2	1
GO:0072525	pyridine-containing compound biosynthetic process	1/59	17/2032	0.395239	0.903077	0.903077	GPR50	1
GO:1901657	glycosyl compound metabolic process	1/59	17/2032	0.395239	0.903077	0.903077	TK1	1
GO:1903362	regulation of cellular protein catabolic process	1/59	17/2032	0.395239	0.903077	0.903077	HSP90AB1	1
GO:2000146	negative regulation of cell motility	1/59	17/2032	0.395239	0.903077	0.903077	SINHCAF	1
GO:0003015	heart process	1/59	18/2032	0.412947	0.903077	0.903077	TGFB2	1
GO:0009135	purine nucleoside diphosphate metabolic process	1/59	18/2032	0.412947	0.903077	0.903077	GPR50	1
GO:0009179	purine ribonucleoside diphosphate metabolic process	1/59	18/2032	0.412947	0.903077	0.903077	GPR50	1
GO:0009185	ribonucleoside diphosphate metabolic process	1/59	18/2032	0.412947	0.903077	0.903077	GPR50	1
GO:0017148	negative regulation of translation	1/59	18/2032	0.412947	0.903077	0.903077	METTL14	1
GO:0019827	stem cell population maintenance	1/59	18/2032	0.412947	0.903077	0.903077	METTL14	1
GO:0030323	respiratory tube development	1/59	18/2032	0.412947	0.903077	0.903077	TGFB2	1
GO:0030324	lung development	1/59	18/2032	0.412947	0.903077	0.903077	TGFB2	1
GO:0031123	RNA 3'-end processing	1/59	18/2032	0.412947	0.903077	0.903077	SUPV3L1	1
GO:0031669	cellular response to nutrient levels	1/59	18/2032	0.412947	0.903077	0.903077	BMT2	1
GO:0042594	response to starvation	1/59	18/2032	0.412947	0.903077	0.903077	BMT2	1
GO:0046031	ADP metabolic process	1/59	18/2032	0.412947	0.903077	0.903077	GPR50	1
GO:0051091	positive regulation of DNA-binding transcription factor activity	1/59	18/2032	0.412947	0.903077	0.903077	HMGN3	1
GO:0051607	defense response to virus	1/59	18/2032	0.412947	0.903077	0.903077	MX1	1
GO:0051650	establishment of vesicle localization	1/59	18/2032	0.412947	0.903077	0.903077	SEC23B	1
GO:0060047	heart contraction	1/59	18/2032	0.412947	0.903077	0.903077	TGFB2	1
GO:0071897	DNA biosynthetic process	1/59	18/2032	0.412947	0.903077	0.903077	TK1	1
GO:0006479	protein methylation	1/59	19/2032	0.430145	0.903077	0.903077	SUV39H2	1
GO:0007088	regulation of mitotic nuclear division	1/59	19/2032	0.430145	0.903077	0.903077	NDC80	1
GO:0008213	protein alkylation	1/59	19/2032	0.430145	0.903077	0.903077	SUV39H2	1
GO:0009166	nucleotide catabolic process	1/59	19/2032	0.430145	0.903077	0.903077	GPR50	1
GO:0016197	endosomal transport	1/59	19/2032	0.430145	0.903077	0.903077	ARF6	1
GO:0046578	regulation of Ras protein signal transduction	1/59	19/2032	0.430145	0.903077	0.903077	ARF6	1
GO:0046660	female sex differentiation	1/59	19/2032	0.430145	0.903077	0.903077	TGFB2	1
GO:0051403	stress-activated MAPK cascade	1/59	19/2032	0.430145	0.903077	0.903077	TGFB2	1
GO:0051648	vesicle localization	1/59	19/2032	0.430145	0.903077	0.903077	SEC23B	1
GO:0097191	extrinsic apoptotic signaling pathway	1/59	19/2032	0.430145	0.903077	0.903077	TGFB2	1
GO:0098727	maintenance of cell number	1/59	19/2032	0.430145	0.903077	0.903077	METTL14	1
GO:0000070	mitotic sister chromatid segregation	1/59	20/2032	0.446847	0.903077	0.903077	NDC80	1
GO:0006090	pyruvate metabolic process	1/59	20/2032	0.446847	0.903077	0.903077	GPR50	1
GO:0006165	nucleoside diphosphate phosphorylation	1/59	20/2032	0.446847	0.903077	0.903077	GPR50	1
GO:0006413	translational initiation	1/59	20/2032	0.446847	0.903077	0.903077	DNAJC3	1
GO:0007033	vacuole organization	1/59	20/2032	0.446847	0.903077	0.903077	HOOK1	1
GO:0010001	glial cell differentiation	1/59	20/2032	0.446847	0.903077	0.903077	METTL14	1
GO:0010921	regulation of phosphatase activity	1/59	20/2032	0.446847	0.903077	0.903077	TGFB2	1
GO:0016072	rRNA metabolic process	1/59	20/2032	0.446847	0.903077	0.903077	BMT2	1
GO:0031668	cellular response to extracellular stimulus	1/59	20/2032	0.446847	0.903077	0.903077	BMT2	1
GO:0032392	DNA geometric change	1/59	20/2032	0.446847	0.903077	0.903077	SUPV3L1	1
GO:0034249	negative regulation of cellular amide metabolic process	1/59	20/2032	0.446847	0.903077	0.903077	METTL14	1
GO:0035051	cardiocyte differentiation	1/59	20/2032	0.446847	0.903077	0.903077	TGFB2	1
GO:0046939	nucleotide phosphorylation	1/59	20/2032	0.446847	0.903077	0.903077	GPR50	1
GO:1901292	nucleoside phosphate catabolic process	1/59	20/2032	0.446847	0.903077	0.903077	GPR50	1
GO:1901988	negative regulation of cell cycle phase transition	1/59	20/2032	0.446847	0.903077	0.903077	NDC80	1
GO:2000241	regulation of reproductive process	1/59	20/2032	0.446847	0.903077	0.903077	EAF2	1
GO:0006469	negative regulation of protein kinase activity	1/59	21/2032	0.463068	0.903077	0.903077	DNAJC3	1
GO:0006754	ATP biosynthetic process	1/59	21/2032	0.463068	0.903077	0.903077	GPR50	1
GO:0009132	nucleoside diphosphate metabolic process	1/59	21/2032	0.463068	0.903077	0.903077	GPR50	1
GO:0019362	pyridine nucleotide metabolic process	1/59	21/2032	0.463068	0.903077	0.903077	GPR50	1
GO:0046496	nicotinamide nucleotide metabolic process	1/59	21/2032	0.463068	0.903077	0.903077	GPR50	1
GO:0048706	embryonic skeletal system development	1/59	21/2032	0.463068	0.903077	0.903077	HOXB4	1
GO:0060541	respiratory system development	1/59	21/2032	0.463068	0.903077	0.903077	TGFB2	1
GO:0070507	regulation of microtubule cytoskeleton organization	1/59	21/2032	0.463068	0.903077	0.903077	STMN1	1
GO:0072524	pyridine-containing compound metabolic process	1/59	21/2032	0.463068	0.903077	0.903077	GPR50	1
GO:1901654	response to ketone	1/59	21/2032	0.463068	0.903077	0.903077	TGFB2	1
GO:0001822	kidney development	1/59	22/2032	0.47882	0.903077	0.903077	C1GALT1	1
GO:0006338	chromatin remodeling	1/59	22/2032	0.47882	0.903077	0.903077	SUV39H2	1
GO:0007519	skeletal muscle tissue development	1/59	22/2032	0.47882	0.903077	0.903077	TGFB2	1
GO:0009145	purine nucleoside triphosphate biosynthetic process	1/59	22/2032	0.47882	0.903077	0.903077	GPR50	1
GO:0009206	purine ribonucleoside triphosphate biosynthetic process	1/59	22/2032	0.47882	0.903077	0.903077	GPR50	1
GO:0015893	drug transport	1/59	22/2032	0.47882	0.903077	0.903077	SLC7A2	1
GO:0021700	developmental maturation	1/59	22/2032	0.47882	0.903077	0.903077	TGFB2	1
GO:0030278	regulation of ossification	1/59	22/2032	0.47882	0.903077	0.903077	TGFB2	1
GO:0031334	positive regulation of protein complex assembly	1/59	22/2032	0.47882	0.903077	0.903077	ARF6	1
GO:0032886	regulation of microtubule-based process	1/59	22/2032	0.47882	0.903077	0.903077	STMN1	1
GO:0033673	negative regulation of kinase activity	1/59	22/2032	0.47882	0.903077	0.903077	DNAJC3	1
GO:0040013	negative regulation of locomotion	1/59	22/2032	0.47882	0.903077	0.903077	SINHCAF	1
GO:0043523	regulation of neuron apoptotic process	1/59	22/2032	0.47882	0.903077	0.903077	TGFB2	1
GO:0051271	negative regulation of cellular component movement	1/59	22/2032	0.47882	0.903077	0.903077	SINHCAF	1
GO:0002440	production of molecular mediator of immune response	1/59	23/2032	0.494119	0.903077	0.903077	TGFB2	1
GO:0006733	oxidoreduction coenzyme metabolic process	1/59	23/2032	0.494119	0.903077	0.903077	GPR50	1
GO:0007156	homophilic cell adhesion via plasma membrane adhesion molecules	1/59	23/2032	0.494119	0.903077	0.903077	CDH3	1
GO:0007283	spermatogenesis	1/59	23/2032	0.494119	0.903077	0.903077	METTL14	1
GO:0009201	ribonucleoside triphosphate biosynthetic process	1/59	23/2032	0.494119	0.903077	0.903077	GPR50	1
GO:0016236	macroautophagy	1/59	23/2032	0.494119	0.903077	0.903077	SEC23B	1
GO:0031098	stress-activated protein kinase signaling cascade	1/59	23/2032	0.494119	0.903077	0.903077	TGFB2	1
GO:0033002	muscle cell proliferation	1/59	23/2032	0.494119	0.903077	0.903077	TGFB2	1
GO:0035303	regulation of dephosphorylation	1/59	23/2032	0.494119	0.903077	0.903077	TGFB2	1
GO:0045930	negative regulation of mitotic cell cycle	1/59	23/2032	0.494119	0.903077	0.903077	NDC80	1
GO:0046434	organophosphate catabolic process	1/59	23/2032	0.494119	0.903077	0.903077	GPR50	1
GO:0060538	skeletal muscle organ development	1/59	23/2032	0.494119	0.903077	0.903077	TGFB2	1
GO:0071496	cellular response to external stimulus	1/59	23/2032	0.494119	0.903077	0.903077	BMT2	1
GO:0072001	renal system development	1/59	23/2032	0.494119	0.903077	0.903077	C1GALT1	1
GO:1901990	regulation of mitotic cell cycle phase transition	1/59	23/2032	0.494119	0.903077	0.903077	NDC80	1
GO:0001837	epithelial to mesenchymal transition	1/59	24/2032	0.508975	0.903491	0.903491	TGFB2	1
GO:0006334	nucleosome assembly	1/59	24/2032	0.508975	0.903491	0.903491	HIST1H2B5	1
GO:0016052	carbohydrate catabolic process	1/59	24/2032	0.508975	0.903491	0.903491	GPR50	1
GO:0019221	cytokine-mediated signaling pathway	1/59	24/2032	0.508975	0.903491	0.903491	EGR1	1
GO:0030509	BMP signaling pathway	1/59	24/2032	0.508975	0.903491	0.903491	NEO1	1
GO:0034404	nucleobase-containing small molecule biosynthetic process	1/59	24/2032	0.508975	0.903491	0.903491	GPR50	1
GO:0048232	male gamete generation	1/59	24/2032	0.508975	0.903491	0.903491	METTL14	1
GO:0051056	regulation of small GTPase mediated signal transduction	1/59	24/2032	0.508975	0.903491	0.903491	ARF6	1
GO:0051261	protein depolymerization	1/59	24/2032	0.508975	0.903491	0.903491	STMN1	1
GO:0051302	regulation of cell division	1/59	24/2032	0.508975	0.903491	0.903491	TGFB2	1
GO:0072659	protein localization to plasma membrane	1/59	24/2032	0.508975	0.903491	0.903491	ARF6	1
GO:0006887	exocytosis	1/59	25/2032	0.523403	0.903491	0.903491	VSNL1	1
GO:0007369	gastrulation	1/59	25/2032	0.523403	0.903491	0.903491	C1H2ORF49	1
GO:0008406	gonad development	1/59	25/2032	0.523403	0.903491	0.903491	TGFB2	1
GO:0009266	response to temperature stimulus	1/59	25/2032	0.523403	0.903491	0.903491	DNAJC3	1
GO:0015711	organic anion transport	1/59	25/2032	0.523403	0.903491	0.903491	SLC7A2	1
GO:0045137	development of primary sexual characteristics	1/59	25/2032	0.523403	0.903491	0.903491	TGFB2	1
GO:0051402	neuron apoptotic process	1/59	25/2032	0.523403	0.903491	0.903491	TGFB2	1
GO:0051783	regulation of nuclear division	1/59	25/2032	0.523403	0.903491	0.903491	NDC80	1
GO:0002697	regulation of immune effector process	1/59	26/2032	0.537413	0.903491	0.903491	TGFB2	1
GO:0009142	nucleoside triphosphate biosynthetic process	1/59	26/2032	0.537413	0.903491	0.903491	GPR50	1
GO:0031497	chromatin assembly	1/59	26/2032	0.537413	0.903491	0.903491	HIST1H2B5	1
GO:0043624	cellular protein complex disassembly	1/59	26/2032	0.537413	0.903491	0.903491	STMN1	1
GO:0051348	negative regulation of transferase activity	1/59	26/2032	0.537413	0.903491	0.903491	DNAJC3	1
GO:0060326	cell chemotaxis	1/59	26/2032	0.537413	0.903491	0.903491	TGFB2	1
GO:0090068	positive regulation of cell cycle process	1/59	26/2032	0.537413	0.903491	0.903491	NDC80	1
GO:1902905	positive regulation of supramolecular fiber organization	1/59	26/2032	0.537413	0.903491	0.903491	ARF6	1
GO:0000075	cell cycle checkpoint	1/59	27/2032	0.551019	0.905708	0.905708	NDC80	1
GO:0000819	sister chromatid segregation	1/59	27/2032	0.551019	0.905708	0.905708	NDC80	1
GO:0002757	immune response-activating signal transduction	1/59	27/2032	0.551019	0.905708	0.905708	MYO1G	1
GO:0007162	negative regulation of cell adhesion	1/59	27/2032	0.551019	0.905708	0.905708	TGFB2	1
GO:0030198	extracellular matrix organization	1/59	27/2032	0.551019	0.905708	0.905708	TGFB2	1
GO:0051090	regulation of DNA-binding transcription factor activity	1/59	27/2032	0.551019	0.905708	0.905708	HMGN3	1
GO:0051495	positive regulation of cytoskeleton organization	1/59	27/2032	0.551019	0.905708	0.905708	ARF6	1
GO:0071773	cellular response to BMP stimulus	1/59	27/2032	0.551019	0.905708	0.905708	NEO1	1
GO:0034728	nucleosome organization	1/59	28/2032	0.564231	0.905708	0.905708	HIST1H2B5	1
GO:0044262	cellular carbohydrate metabolic process	1/59	28/2032	0.564231	0.905708	0.905708	GPR50	1
GO:0046677	response to antibiotic	1/59	28/2032	0.564231	0.905708	0.905708	CYP1A2	1
GO:0062012	regulation of small molecule metabolic process	1/59	28/2032	0.564231	0.905708	0.905708	GPR50	1
GO:0071772	response to BMP	1/59	28/2032	0.564231	0.905708	0.905708	NEO1	1
GO:1901214	regulation of neuron death	1/59	28/2032	0.564231	0.905708	0.905708	TGFB2	1
GO:0002764	immune response-regulating signaling pathway	1/59	29/2032	0.57706	0.905708	0.905708	MYO1G	1
GO:0006457	protein folding	1/59	29/2032	0.57706	0.905708	0.905708	HSP90AB1	1
GO:0007548	sex differentiation	1/59	29/2032	0.57706	0.905708	0.905708	TGFB2	1
GO:0032147	activation of protein kinase activity	1/59	29/2032	0.57706	0.905708	0.905708	TGFB2	1
GO:0043547	positive regulation of GTPase activity	1/59	29/2032	0.57706	0.905708	0.905708	SEC23B	1
GO:0048193	Golgi vesicle transport	1/59	29/2032	0.57706	0.905708	0.905708	SEC23B	1
GO:0072594	establishment of protein localization to organelle	1/59	29/2032	0.57706	0.905708	0.905708	SPCS3	1
GO:1990778	protein localization to cell periphery	1/59	29/2032	0.57706	0.905708	0.905708	ARF6	1
GO:0009108	coenzyme biosynthetic process	1/59	30/2032	0.589518	0.905708	0.905708	GPR50	1
GO:0031667	response to nutrient levels	1/59	30/2032	0.589518	0.905708	0.905708	BMT2	1
GO:0045785	positive regulation of cell adhesion	1/59	30/2032	0.589518	0.905708	0.905708	TGFB2	1
GO:1903311	regulation of mRNA metabolic process	1/59	30/2032	0.589518	0.905708	0.905708	METTL14	1
GO:0001933	negative regulation of protein phosphorylation	1/59	31/2032	0.601616	0.905708	0.905708	DNAJC3	1
GO:0002683	negative regulation of immune system process	1/59	31/2032	0.601616	0.905708	0.905708	TGFB2	1
GO:0006323	DNA packaging	1/59	31/2032	0.601616	0.905708	0.905708	HIST1H2B5	1
GO:0009127	purine nucleoside monophosphate biosynthetic process	1/59	31/2032	0.601616	0.905708	0.905708	GPR50	1
GO:0009168	purine ribonucleoside monophosphate biosynthetic process	1/59	31/2032	0.601616	0.905708	0.905708	GPR50	1
GO:0035265	organ growth	1/59	31/2032	0.601616	0.905708	0.905708	TGFB2	1
GO:0043062	extracellular structure organization	1/59	31/2032	0.601616	0.905708	0.905708	TGFB2	1
GO:0045861	negative regulation of proteolysis	1/59	31/2032	0.601616	0.905708	0.905708	HSP90AB1	1
GO:0070997	neuron death	1/59	31/2032	0.601616	0.905708	0.905708	TGFB2	1
GO:0098742	cell-cell adhesion via plasma-membrane adhesion molecules	1/59	31/2032	0.601616	0.905708	0.905708	CDH3	1
GO:1901605	alpha-amino acid metabolic process	1/59	31/2032	0.601616	0.905708	0.905708	ODC1	1
GO:0009991	response to extracellular stimulus	1/59	32/2032	0.613362	0.911535	0.911535	BMT2	1
GO:1901987	regulation of cell cycle phase transition	1/59	32/2032	0.613362	0.911535	0.911535	NDC80	1
GO:0007601	visual perception	1/59	33/2032	0.624768	0.911535	0.911535	GJC1	1
GO:0009156	ribonucleoside monophosphate biosynthetic process	1/59	33/2032	0.624768	0.911535	0.911535	GPR50	1
GO:0042176	regulation of protein catabolic process	1/59	33/2032	0.624768	0.911535	0.911535	HSP90AB1	1
GO:0042254	ribosome biogenesis	1/59	33/2032	0.624768	0.911535	0.911535	BMT2	1
GO:0050953	sensory perception of light stimulus	1/59	33/2032	0.624768	0.911535	0.911535	GJC1	1
GO:0051260	protein homooligomerization	1/59	33/2032	0.624768	0.911535	0.911535	TK1	1
GO:0072330	monocarboxylic acid biosynthetic process	1/59	33/2032	0.624768	0.911535	0.911535	GPR50	1
GO:0000377	RNA splicing, via transesterification reactions with bulged adenosine as nucleophile	1/59	34/2032	0.635843	0.914439	0.914439	METTL14	1
GO:0000398	mRNA splicing, via spliceosome	1/59	34/2032	0.635843	0.914439	0.914439	METTL14	1
GO:0003007	heart morphogenesis	1/59	34/2032	0.635843	0.914439	0.914439	TGFB2	1
GO:0032984	protein-containing complex disassembly	1/59	34/2032	0.635843	0.914439	0.914439	STMN1	1
GO:0043161	proteasome-mediated ubiquitin-dependent protein catabolic process	1/59	34/2032	0.635843	0.914439	0.914439	HSP90AB1	1
GO:0051188	cofactor biosynthetic process	1/59	34/2032	0.635843	0.914439	0.914439	GPR50	1
GO:0000375	RNA splicing, via transesterification reactions	1/59	35/2032	0.646596	0.921662	0.921662	METTL14	1
GO:0006820	anion transport	1/59	35/2032	0.646596	0.921662	0.921662	SLC7A2	1
GO:0043434	response to peptide hormone	1/59	35/2032	0.646596	0.921662	0.921662	TGFB2	1
GO:0072657	protein localization to membrane	1/59	35/2032	0.646596	0.921662	0.921662	ARF6	1
GO:0009152	purine ribonucleotide biosynthetic process	1/59	36/2032	0.657037	0.922787	0.922787	GPR50	1
GO:0033044	regulation of chromosome organization	1/59	36/2032	0.657037	0.922787	0.922787	NDC80	1
GO:0007411	axon guidance	1/59	37/2032	0.667175	0.922787	0.922787	NEO1	1
GO:0010498	proteasomal protein catabolic process	1/59	37/2032	0.667175	0.922787	0.922787	HSP90AB1	1
GO:0042060	wound healing	1/59	37/2032	0.667175	0.922787	0.922787	TGFB2	1
GO:0051346	negative regulation of hydrolase activity	1/59	37/2032	0.667175	0.922787	0.922787	TGFB2	1
GO:0097485	neuron projection guidance	1/59	37/2032	0.667175	0.922787	0.922787	NEO1	1
GO:0003013	circulatory system process	1/59	38/2032	0.677018	0.922787	0.922787	TGFB2	1
GO:0008015	blood circulation	1/59	38/2032	0.677018	0.922787	0.922787	TGFB2	1
GO:0009260	ribonucleotide biosynthetic process	1/59	38/2032	0.677018	0.922787	0.922787	GPR50	1
GO:0010639	negative regulation of organelle organization	1/59	38/2032	0.677018	0.922787	0.922787	NDC80	1
GO:0030900	forebrain development	1/59	38/2032	0.677018	0.922787	0.922787	METTL14	1
GO:0032386	regulation of intracellular transport	1/59	38/2032	0.677018	0.922787	0.922787	SEC23B	1
GO:0043065	positive regulation of apoptotic process	1/59	38/2032	0.677018	0.922787	0.922787	TGFB2	1
GO:0046034	ATP metabolic process	1/59	38/2032	0.677018	0.922787	0.922787	GPR50	1
GO:0140014	mitotic nuclear division	1/59	38/2032	0.677018	0.922787	0.922787	NDC80	1
GO:1902532	negative regulation of intracellular signal transduction	1/59	38/2032	0.677018	0.922787	0.922787	BMT2	1
GO:0006732	coenzyme metabolic process	1/59	39/2032	0.686574	0.924051	0.924051	GPR50	1
GO:0043068	positive regulation of programmed cell death	1/59	39/2032	0.686574	0.924051	0.924051	TGFB2	1
GO:0043087	regulation of GTPase activity	1/59	39/2032	0.686574	0.924051	0.924051	SEC23B	1
GO:0048762	mesenchymal cell differentiation	1/59	39/2032	0.686574	0.924051	0.924051	TGFB2	1
GO:0098813	nuclear chromosome segregation	1/59	39/2032	0.686574	0.924051	0.924051	NDC80	1
GO:1901652	response to peptide	1/59	39/2032	0.686574	0.924051	0.924051	TGFB2	1
GO:0006066	alcohol metabolic process	1/59	40/2032	0.695853	0.926722	0.926722	LCAT	1
GO:0034762	regulation of transmembrane transport	1/59	40/2032	0.695853	0.926722	0.926722	GPR50	1
GO:0046390	ribose phosphate biosynthetic process	1/59	40/2032	0.695853	0.926722	0.926722	GPR50	1
GO:0048545	response to steroid hormone	1/59	40/2032	0.695853	0.926722	0.926722	TGFB2	1
GO:0007517	muscle organ development	1/59	41/2032	0.704861	0.930494	0.930494	TGFB2	1
GO:0006164	purine nucleotide biosynthetic process	1/59	42/2032	0.713607	0.934371	0.934371	GPR50	1
GO:0006470	protein dephosphorylation	1/59	42/2032	0.713607	0.934371	0.934371	MTMR8	1
GO:0007276	gamete generation	1/59	42/2032	0.713607	0.934371	0.934371	METTL14	1
GO:0009205	purine ribonucleoside triphosphate metabolic process	1/59	42/2032	0.713607	0.934371	0.934371	GPR50	1
GO:0010942	positive regulation of cell death	1/59	42/2032	0.713607	0.934371	0.934371	TGFB2	1
GO:0044772	mitotic cell cycle phase transition	1/59	42/2032	0.713607	0.934371	0.934371	NDC80	1
GO:0006260	DNA replication	1/59	43/2032	0.722098	0.935548	0.935548	SSRP1	1
GO:0006897	endocytosis	1/59	43/2032	0.722098	0.935548	0.935548	MYO1G	1
GO:0009144	purine nucleoside triphosphate metabolic process	1/59	43/2032	0.722098	0.935548	0.935548	GPR50	1
GO:0009199	ribonucleoside triphosphate metabolic process	1/59	43/2032	0.722098	0.935548	0.935548	GPR50	1
GO:0060348	bone development	1/59	43/2032	0.722098	0.935548	0.935548	HOXB4	1
GO:0072522	purine-containing compound biosynthetic process	1/59	44/2032	0.730342	0.935548	0.935548	GPR50	1
GO:0031400	negative regulation of protein modification process	1/59	45/2032	0.738345	0.935548	0.935548	DNAJC3	1
GO:0007265	Ras protein signal transduction	1/59	46/2032	0.746114	0.935548	0.935548	ARF6	1
GO:0022411	cellular component disassembly	1/59	46/2032	0.746114	0.935548	0.935548	STMN1	1
GO:0045860	positive regulation of protein kinase activity	1/59	46/2032	0.746114	0.935548	0.935548	TGFB2	1
GO:0097190	apoptotic signaling pathway	1/59	46/2032	0.746114	0.935548	0.935548	TGFB2	1
GO:0006091	generation of precursor metabolites and energy	1/59	47/2032	0.753656	0.935548	0.935548	GPR50	1
GO:0006954	inflammatory response	1/59	47/2032	0.753656	0.935548	0.935548	FN1	1
GO:0007059	chromosome segregation	1/59	47/2032	0.753656	0.935548	0.935548	NDC80	1
GO:0009141	nucleoside triphosphate metabolic process	1/59	47/2032	0.753656	0.935548	0.935548	GPR50	1
GO:0033674	positive regulation of kinase activity	1/59	47/2032	0.753656	0.935548	0.935548	TGFB2	1
GO:0071345	cellular response to cytokine stimulus	1/59	47/2032	0.753656	0.935548	0.935548	EGR1	1
GO:0001525	angiogenesis	1/59	48/2032	0.760979	0.935548	0.935548	C1GALT1	1
GO:0009126	purine nucleoside monophosphate metabolic process	1/59	48/2032	0.760979	0.935548	0.935548	GPR50	1
GO:0009167	purine ribonucleoside monophosphate metabolic process	1/59	48/2032	0.760979	0.935548	0.935548	GPR50	1
GO:0009611	response to wounding	1/59	48/2032	0.760979	0.935548	0.935548	TGFB2	1
GO:0032787	monocarboxylic acid metabolic process	1/59	48/2032	0.760979	0.935548	0.935548	GPR50	1
GO:0060485	mesenchyme development	1/59	48/2032	0.760979	0.935548	0.935548	TGFB2	1
GO:0009165	nucleotide biosynthetic process	1/59	49/2032	0.768087	0.935548	0.935548	GPR50	1
GO:0044089	positive regulation of cellular component biogenesis	1/59	49/2032	0.768087	0.935548	0.935548	ARF6	1
GO:0007346	regulation of mitotic cell cycle	1/59	50/2032	0.774987	0.935548	0.935548	NDC80	1
GO:0009161	ribonucleoside monophosphate metabolic process	1/59	50/2032	0.774987	0.935548	0.935548	GPR50	1
GO:0019953	sexual reproduction	1/59	50/2032	0.774987	0.935548	0.935548	METTL14	1
GO:0044703	multi-organism reproductive process	1/59	50/2032	0.774987	0.935548	0.935548	METTL14	1
GO:0048562	embryonic organ morphogenesis	1/59	50/2032	0.774987	0.935548	0.935548	HOXB4	1
GO:0051259	protein complex oligomerization	1/59	50/2032	0.774987	0.935548	0.935548	TK1	1
GO:0006511	ubiquitin-dependent protein catabolic process	1/59	51/2032	0.781685	0.935548	0.935548	HSP90AB1	1
GO:0007264	small GTPase mediated signal transduction	1/59	51/2032	0.781685	0.935548	0.935548	ARF6	1
GO:0044770	cell cycle phase transition	1/59	51/2032	0.781685	0.935548	0.935548	NDC80	1
GO:0048705	skeletal system morphogenesis	1/59	51/2032	0.781685	0.935548	0.935548	HOXB4	1
GO:0051347	positive regulation of transferase activity	1/59	51/2032	0.781685	0.935548	0.935548	TGFB2	1
GO:0008380	RNA splicing	1/59	52/2032	0.788187	0.935548	0.935548	METTL14	1
GO:0016053	organic acid biosynthetic process	1/59	52/2032	0.788187	0.935548	0.935548	GPR50	1
GO:0019941	modification-dependent protein catabolic process	1/59	52/2032	0.788187	0.935548	0.935548	HSP90AB1	1
GO:0032504	multicellular organism reproduction	1/59	52/2032	0.788187	0.935548	0.935548	METTL14	1
GO:0043632	modification-dependent macromolecule catabolic process	1/59	52/2032	0.788187	0.935548	0.935548	HSP90AB1	1
GO:0046394	carboxylic acid biosynthetic process	1/59	52/2032	0.788187	0.935548	0.935548	GPR50	1
GO:0048609	multicellular organismal reproductive process	1/59	52/2032	0.788187	0.935548	0.935548	METTL14	1
GO:0009636	response to toxic substance	1/59	54/2032	0.800625	0.936594	0.936594	MBP	1
GO:0010975	regulation of neuron projection development	1/59	54/2032	0.800625	0.936594	0.936594	ARF6	1
GO:0000280	nuclear division	1/59	55/2032	0.806572	0.936594	0.936594	NDC80	1
GO:0051345	positive regulation of hydrolase activity	1/59	55/2032	0.806572	0.936594	0.936594	SEC23B	1
GO:0005975	carbohydrate metabolic process	1/59	57/2032	0.817948	0.936594	0.936594	GPR50	1
GO:0009150	purine ribonucleotide metabolic process	1/59	58/2032	0.823386	0.936594	0.936594	GPR50	1
GO:0030162	regulation of proteolysis	1/59	58/2032	0.823386	0.936594	0.936594	HSP90AB1	1
GO:0034097	response to cytokine	1/59	58/2032	0.823386	0.936594	0.936594	EGR1	1
GO:0001654	eye development	1/59	60/2032	0.833788	0.936594	0.936594	TGFB2	1
GO:0006310	DNA recombination	1/59	60/2032	0.833788	0.936594	0.936594	SUPV3L1	1
GO:0007268	chemical synaptic transmission	1/59	60/2032	0.833788	0.936594	0.936594	GJC1	1
GO:0007420	brain development	1/59	60/2032	0.833788	0.936594	0.936594	METTL14	1
GO:0009259	ribonucleotide metabolic process	1/59	60/2032	0.833788	0.936594	0.936594	GPR50	1
GO:0010638	positive regulation of organelle organization	1/59	60/2032	0.833788	0.936594	0.936594	ARF6	1
GO:0030155	regulation of cell adhesion	1/59	60/2032	0.833788	0.936594	0.936594	TGFB2	1
GO:0030855	epithelial cell differentiation	1/59	60/2032	0.833788	0.936594	0.936594	C1GALT1	1
GO:0051603	proteolysis involved in cellular protein catabolic process	1/59	60/2032	0.833788	0.936594	0.936594	HSP90AB1	1
GO:0098916	anterograde trans-synaptic signaling	1/59	60/2032	0.833788	0.936594	0.936594	GJC1	1
GO:0099537	trans-synaptic signaling	1/59	60/2032	0.833788	0.936594	0.936594	GJC1	1
GO:0150063	visual system development	1/59	60/2032	0.833788	0.936594	0.936594	TGFB2	1
GO:0043410	positive regulation of MAPK cascade	1/59	61/2032	0.838761	0.936594	0.936594	TGFB2	1
GO:0048880	sensory system development	1/59	61/2032	0.838761	0.936594	0.936594	TGFB2	1
GO:0099536	synaptic signaling	1/59	61/2032	0.838761	0.936594	0.936594	GJC1	1
GO:0006397	mRNA processing	1/59	62/2032	0.843588	0.936594	0.936594	METTL14	1
GO:0019693	ribose phosphate metabolic process	1/59	62/2032	0.843588	0.936594	0.936594	GPR50	1
GO:0022613	ribonucleoprotein complex biogenesis	1/59	63/2032	0.848272	0.936594	0.936594	BMT2	1
GO:0044257	cellular protein catabolic process	1/59	63/2032	0.848272	0.936594	0.936594	HSP90AB1	1
GO:0051129	negative regulation of cellular component organization	1/59	63/2032	0.848272	0.936594	0.936594	NDC80	1
GO:0051186	cofactor metabolic process	1/59	63/2032	0.848272	0.936594	0.936594	GPR50	1
GO:0055065	metal ion homeostasis	1/59	64/2032	0.852819	0.939464	0.939464	NEO1	1
GO:0006163	purine nucleotide metabolic process	1/59	65/2032	0.857231	0.941101	0.941101	GPR50	1
GO:0014070	response to organic cyclic compound	1/59	67/2032	0.86567	0.945328	0.945328	TGFB2	1
GO:0007409	axonogenesis	1/59	68/2032	0.869703	0.945328	0.945328	NEO1	1
GO:0032446	protein modification by small protein conjugation	1/59	68/2032	0.869703	0.945328	0.945328	EGR1	1
GO:0072521	purine-containing compound metabolic process	1/59	68/2032	0.869703	0.945328	0.945328	GPR50	1
GO:0060322	head development	1/59	70/2032	0.877416	0.950287	0.950287	METTL14	1
GO:0055080	cation homeostasis	1/59	71/2032	0.881102	0.951967	0.951967	NEO1	1
GO:0098771	inorganic ion homeostasis	1/59	71/2032	0.881102	0.951967	0.951967	NEO1	1
GO:0045596	negative regulation of cell differentiation	1/59	72/2032	0.884679	0.953872	0.953872	SINHCAF	1
GO:0045664	regulation of neuron differentiation	1/59	74/2032	0.891519	0.958036	0.958036	ARF6	1
GO:0061061	muscle structure development	1/59	74/2032	0.891519	0.958036	0.958036	TGFB2	1
GO:0001775	cell activation	1/59	75/2032	0.894788	0.958347	0.958347	TGFB2	1
GO:0010243	response to organonitrogen compound	1/59	75/2032	0.894788	0.958347	0.958347	TGFB2	1
GO:0061564	axon development	1/59	75/2032	0.894788	0.958347	0.958347	NEO1	1
GO:0007186	G protein-coupled receptor signaling pathway	1/59	76/2032	0.89796	0.959614	0.959614	GPR50	1
GO:0050801	ion homeostasis	1/59	76/2032	0.89796	0.959614	0.959614	NEO1	1
GO:0007423	sensory organ development	1/59	77/2032	0.901038	0.959715	0.959715	TGFB2	1
GO:0033993	response to lipid	1/59	77/2032	0.901038	0.959715	0.959715	TGFB2	1
GO:0098609	cell-cell adhesion	1/59	77/2032	0.901038	0.959715	0.959715	CDH3	1
GO:0098655	cation transmembrane transport	1/59	81/2032	0.912463	0.96215	0.96215	SLC7A2	1
GO:0070647	protein modification by small protein conjugation or removal	1/59	82/2032	0.91511	0.96215	0.96215	EGR1	1
GO:0010469	regulation of signaling receptor activity	1/59	83/2032	0.917678	0.96215	0.96215	TGFB2	1
GO:0043408	regulation of MAPK cascade	1/59	83/2032	0.917678	0.96215	0.96215	TGFB2	1
GO:1903047	mitotic cell cycle process	1/59	83/2032	0.917678	0.96215	0.96215	NDC80	1
GO:0007417	central nervous system development	1/59	84/2032	0.92017	0.96215	0.96215	METTL14	1
GO:0030163	protein catabolic process	1/59	84/2032	0.92017	0.96215	0.96215	HSP90AB1	1
GO:1901698	response to nitrogen compound	1/59	84/2032	0.92017	0.96215	0.96215	TGFB2	1
GO:0044283	small molecule biosynthetic process	1/59	85/2032	0.922588	0.96215	0.96215	GPR50	1
GO:0050767	regulation of neurogenesis	1/59	86/2032	0.924934	0.96215	0.96215	ARF6	1
GO:0048589	developmental growth	1/59	89/2032	0.93156	0.964544	0.964544	TGFB2	1
GO:0000165	MAPK cascade	1/59	90/2032	0.933638	0.96566	0.96566	TGFB2	1
GO:0009725	response to hormone	1/59	91/2032	0.935654	0.96666	0.96666	TGFB2	1
GO:0006281	DNA repair	1/59	92/2032	0.93761	0.96666	0.96666	SSRP1	1
GO:0023014	signal transduction by protein phosphorylation	1/59	92/2032	0.93761	0.96666	0.96666	TGFB2	1
GO:0051960	regulation of nervous system development	1/59	94/2032	0.941348	0.968364	0.968364	ARF6	1
GO:0060284	regulation of cell development	1/59	98/2032	0.948176	0.971463	0.971463	ARF6	1
GO:1902533	positive regulation of intracellular signal transduction	1/59	102/2032	0.954221	0.972699	0.972699	TGFB2	1
GO:0043066	negative regulation of apoptotic process	1/59	104/2032	0.956978	0.972699	0.972699	SUPV3L1	1
GO:0043069	negative regulation of programmed cell death	1/59	104/2032	0.956978	0.972699	0.972699	SUPV3L1	1
GO:0000278	mitotic cell cycle	1/59	105/2032	0.958294	0.972699	0.972699	NDC80	1
GO:1901565	organonitrogen compound catabolic process	1/59	107/2032	0.96081	0.973172	0.973172	HSP90AB1	1
GO:0006812	cation transport	1/59	108/2032	0.962011	0.973172	0.973172	SLC7A2	1
GO:0060548	negative regulation of cell death	1/59	111/2032	0.965401	0.97551	0.97551	SUPV3L1	1
GO:0001934	positive regulation of protein phosphorylation	1/59	118/2032	0.972198	0.981351	0.981351	TGFB2	1
GO:0009968	negative regulation of signal transduction	1/59	120/2032	0.973886	0.981576	0.981576	BMT2	1
GO:0042327	positive regulation of phosphorylation	1/59	121/2032	0.974692	0.981576	0.981576	TGFB2	1
GO:0006974	cellular response to DNA damage stimulus	1/59	122/2032	0.975473	0.981576	0.981576	SSRP1	1
GO:0010562	positive regulation of phosphorus metabolic process	1/59	130/2032	0.980927	0.98501	0.98501	TGFB2	1
GO:0045937	positive regulation of phosphate metabolic process	1/59	130/2032	0.980927	0.98501	0.98501	TGFB2	1
GO:0031401	positive regulation of protein modification process	1/59	136/2032	0.984217	0.986025	0.986025	TGFB2	1

## Sheet: CC
ID	Term	GeneRatio	BgRatio	PValue	p.adjust	qvalue	geneID	Count
GO:0043228	non-membrane-bounded organelle	15/60	500/2139	0.431628	0.953547	0.953547	NEO1/SUPV3L1/SSRP1/HOOK1/SUV39H2/HOXB4/STMN1/HDAC1/MYO1G/BMT2/SINHCAF/NDC80/HMGN3/CENPO/HIST1H2B5	15
GO:0043232	intracellular non-membrane-bounded organelle	15/60	500/2139	0.431628	0.953547	0.953547	NEO1/SUPV3L1/SSRP1/HOOK1/SUV39H2/HOXB4/STMN1/HDAC1/MYO1G/BMT2/SINHCAF/NDC80/HMGN3/CENPO/HIST1H2B5	15
GO:0031974	membrane-enclosed lumen	14/60	378/2139	0.159457	0.953547	0.953547	SUPV3L1/SSRP1/GPR50/HDAC1/EARS2/EGR1/BMT2/EAF2/METTL14/HSD11B1L/SINHCAF/NDC80/CENPO/FAM206A	14
GO:0043233	organelle lumen	14/60	378/2139	0.159457	0.953547	0.953547	SUPV3L1/SSRP1/GPR50/HDAC1/EARS2/EGR1/BMT2/EAF2/METTL14/HSD11B1L/SINHCAF/NDC80/CENPO/FAM206A	14
GO:0070013	intracellular organelle lumen	14/60	378/2139	0.159457	0.953547	0.953547	SUPV3L1/SSRP1/GPR50/HDAC1/EARS2/EGR1/BMT2/EAF2/METTL14/HSD11B1L/SINHCAF/NDC80/CENPO/FAM206A	14
GO:0016021	integral component of membrane	14/60	481/2139	0.488088	0.953547	0.953547	CDH3/NEO1/GPR50/SLC2A2/MSMO1/C1GALT1/TMEM184C/SPCS3/GJC1/TMEM104/LARGE2/PTCH1/SLC7A2/MBOAT2	14
GO:0044428	nuclear part	13/60	400/2139	0.324049	0.953547	0.953547	SSRP1/MTMR8/GPR50/HDAC1/EGR1/BMT2/EAF2/METTL14/HSD11B1L/SINHCAF/NDC80/CENPO/FAM206A	13
GO:0031981	nuclear lumen	12/60	318/2139	0.169653	0.953547	0.953547	SSRP1/GPR50/HDAC1/EGR1/BMT2/EAF2/METTL14/HSD11B1L/SINHCAF/NDC80/CENPO/FAM206A	12
GO:0005576	extracellular region	10/60	322/2139	0.416663	0.953547	0.953547	FN1/TGFB2/AvBD13/AVD/LCAT/MBL2/HSP90AB1/MGP/HSD11B1L/LOC422894	10
GO:0005886	plasma membrane	10/60	452/2139	0.846631	0.953547	0.953547	CDH3/NEO1/GPR50/SLC2A2/ARF6/GJC1/MYO1G/PTCH1/SLC7A2/MBP	10
GO:0071944	cell periphery	10/60	467/2139	0.875358	0.953547	0.953547	CDH3/NEO1/GPR50/SLC2A2/ARF6/GJC1/MYO1G/PTCH1/SLC7A2/MBP	10
GO:0005654	nucleoplasm	9/60	240/2139	0.224343	0.953547	0.953547	GPR50/HDAC1/EGR1/EAF2/METTL14/HSD11B1L/SINHCAF/NDC80/FAM206A	9
GO:0005694	chromosome	8/60	158/2139	0.0704322	0.953547	0.953547	SSRP1/SUV39H2/HDAC1/SINHCAF/NDC80/HMGN3/CENPO/HIST1H2B5	8
GO:0012505	endomembrane system	8/60	372/2139	0.84536	0.953547	0.953547	CYP1A2/MTMR8/SEC23B/MSMO1/SPCS3/DNAJC3/ARF6/LARGE2	8
GO:0044427	chromosomal part	7/60	143/2139	0.101542	0.953547	0.953547	SUV39H2/HDAC1/SINHCAF/NDC80/HMGN3/CENPO/HIST1H2B5	7
GO:0042995	cell projection	6/60	217/2139	0.579788	0.953547	0.953547	TGFB2/ARF6/STMN1/MYO1G/MBP/FAM206A	6
GO:0031090	organelle membrane	6/60	259/2139	0.752824	0.953547	0.953547	CYP1A2/SEC23B/SPCS3/ARF6/LARGE2/MX1	6
GO:0044459	plasma membrane part	6/60	260/2139	0.756256	0.953547	0.953547	CDH3/NEO1/ARF6/GJC1/MYO1G/PTCH1	6
GO:0005829	cytosol	6/60	304/2139	0.875517	0.953547	0.953547	SEC23B/HOOK1/DNAJC3/ARF6/HSP90AB1/VSNL1	6
GO:0000785	chromatin	5/60	86/2139	0.090372	0.953547	0.953547	SUV39H2/HDAC1/SINHCAF/HMGN3/HIST1H2B5	5
GO:0031984	organelle subcompartment	5/60	157/2139	0.453423	0.953547	0.953547	CYP1A2/SEC23B/MSMO1/SPCS3/LARGE2	5
GO:1902494	catalytic complex	5/60	159/2139	0.464742	0.953547	0.953547	SUPV3L1/SPCS3/HDAC1/METTL14/SINHCAF	5
GO:0005783	endoplasmic reticulum	5/60	167/2139	0.509338	0.953547	0.953547	CYP1A2/SEC23B/MSMO1/SPCS3/DNAJC3	5
GO:0044430	cytoskeletal part	5/60	189/2139	0.62362	0.953547	0.953547	HOOK1/HOXB4/STMN1/MYO1G/NDC80	5
GO:0120025	plasma membrane bounded cell projection	5/60	210/2139	0.717268	0.953547	0.953547	TGFB2/ARF6/STMN1/MBP/FAM206A	5
GO:0005856	cytoskeleton	5/60	241/2139	0.824251	0.953547	0.953547	HOOK1/HOXB4/STMN1/MYO1G/NDC80	5
GO:0044454	nuclear chromosome part	4/60	72/2139	0.140677	0.953547	0.953547	HDAC1/SINHCAF/NDC80/CENPO	4
GO:0000228	nuclear chromosome	4/60	74/2139	0.151119	0.953547	0.953547	HDAC1/SINHCAF/NDC80/CENPO	4
GO:0005789	endoplasmic reticulum membrane	4/60	96/2139	0.281569	0.953547	0.953547	CYP1A2/SEC23B/MSMO1/SPCS3	4
GO:0042175	nuclear outer membrane-endoplasmic reticulum membrane network	4/60	97/2139	0.287966	0.953547	0.953547	CYP1A2/SEC23B/MSMO1/SPCS3	4
GO:0098827	endoplasmic reticulum subcompartment	4/60	98/2139	0.294386	0.953547	0.953547	CYP1A2/SEC23B/MSMO1/SPCS3	4
GO:0044432	endoplasmic reticulum part	4/60	111/2139	0.379027	0.953547	0.953547	CYP1A2/SEC23B/MSMO1/SPCS3	4
GO:0015630	microtubule cytoskeleton	4/60	114/2139	0.398612	0.953547	0.953547	HOOK1/HOXB4/STMN1/NDC80	4
GO:0044451	nucleoplasm part	4/60	116/2139	0.411626	0.953547	0.953547	HDAC1/EAF2/SINHCAF/FAM206A	4
GO:0098796	membrane protein complex	4/60	133/2139	0.519153	0.953547	0.953547	CDH3/SEC23B/SPCS3/GJC1	4
GO:0043005	neuron projection	4/60	153/2139	0.633261	0.953547	0.953547	TGFB2/STMN1/MBP/FAM206A	4
GO:0097458	neuron part	4/60	176/2139	0.741839	0.953547	0.953547	TGFB2/STMN1/MBP/FAM206A	4
GO:0000775	chromosome, centromeric region	3/60	39/2139	0.0940352	0.953547	0.953547	SUV39H2/NDC80/CENPO	3
GO:0005813	centrosome	3/60	47/2139	0.14299	0.953547	0.953547	HOOK1/HOXB4/NDC80	3
GO:0098687	chromosomal region	3/60	57/2139	0.213306	0.953547	0.953547	SUV39H2/NDC80/CENPO	3
GO:0031012	extracellular matrix	3/60	65/2139	0.274034	0.953547	0.953547	FN1/TGFB2/MGP	3
GO:0030424	axon	3/60	66/2139	0.281784	0.953547	0.953547	TGFB2/MBP/FAM206A	3
GO:0005815	microtubule organizing center	3/60	72/2139	0.328631	0.953547	0.953547	HOOK1/HOXB4/NDC80	3
GO:0036477	somatodendritic compartment	3/60	72/2139	0.328631	0.953547	0.953547	TGFB2/MBP/FAM206A	3
GO:0044429	mitochondrial part	3/60	94/2139	0.496466	0.953547	0.953547	SUPV3L1/EARS2/MX1	3
GO:0044463	cell projection part	3/60	120/2139	0.665118	0.953547	0.953547	ARF6/MBP/FAM206A	3
GO:0120038	plasma membrane bounded cell projection part	3/60	120/2139	0.665118	0.953547	0.953547	ARF6/MBP/FAM206A	3
GO:0005794	Golgi apparatus	3/60	127/2139	0.703077	0.953547	0.953547	SEC23B/ARF6/LARGE2	3
GO:0099080	supramolecular complex	3/60	133/2139	0.733011	0.953547	0.953547	NEO1/HOOK1/STMN1	3
GO:0099081	supramolecular polymer	3/60	133/2139	0.733011	0.953547	0.953547	NEO1/HOOK1/STMN1	3
GO:0099512	supramolecular fiber	3/60	133/2139	0.733011	0.953547	0.953547	NEO1/HOOK1/STMN1	3
GO:0005739	mitochondrion	3/60	140/2139	0.764961	0.953547	0.953547	SUPV3L1/EARS2/MX1	3
GO:0031410	cytoplasmic vesicle	3/60	174/2139	0.879308	0.953547	0.953547	SEC23B/ARF6/HSP90AB1	3
GO:0097708	intracellular vesicle	3/60	174/2139	0.879308	0.953547	0.953547	SEC23B/ARF6/HSP90AB1	3
GO:0098588	bounding membrane of organelle	3/60	178/2139	0.888929	0.953547	0.953547	SEC23B/ARF6/LARGE2	3
GO:0031982	vesicle	3/60	187/2139	0.908164	0.953547	0.953547	SEC23B/ARF6/HSP90AB1	3
GO:0044421	extracellular region part	3/60	245/2139	0.975493	0.982314	0.982314	FN1/TGFB2/MGP	3
GO:0000777	condensed chromosome kinetochore	2/60	17/2139	0.0803635	0.953547	0.953547	NDC80/CENPO	2
GO:0030175	filopodium	2/60	17/2139	0.0803635	0.953547	0.953547	ARF6/FAM206A	2
GO:0000779	condensed chromosome, centromeric region	2/60	18/2139	0.0888231	0.953547	0.953547	NDC80/CENPO	2
GO:0043209	myelin sheath	2/60	21/2139	0.115638	0.953547	0.953547	ARF6/MBP	2
GO:0098858	actin-based cell projection	2/60	24/2139	0.144209	0.953547	0.953547	ARF6/FAM206A	2
GO:0000776	kinetochore	2/60	25/2139	0.154042	0.953547	0.953547	NDC80/CENPO	2
GO:0043025	neuronal cell body	2/60	25/2139	0.154042	0.953547	0.953547	TGFB2/MBP	2
GO:0000793	condensed chromosome	2/60	26/2139	0.164004	0.953547	0.953547	NDC80/CENPO	2
GO:0033267	axon part	2/60	30/2139	0.204857	0.953547	0.953547	MBP/FAM206A	2
GO:0044297	cell body	2/60	30/2139	0.204857	0.953547	0.953547	TGFB2/MBP	2
GO:0005759	mitochondrial matrix	2/60	31/2139	0.215257	0.953547	0.953547	SUPV3L1/EARS2	2
GO:0016607	nuclear speck	2/60	35/2139	0.257262	0.953547	0.953547	EAF2/FAM206A	2
GO:0019898	extrinsic component of membrane	2/60	36/2139	0.267814	0.953547	0.953547	CDH3/SEC23B	2
GO:0005874	microtubule	2/60	42/2139	0.330896	0.953547	0.953547	HOOK1/STMN1	2
GO:0005911	cell-cell junction	2/60	43/2139	0.341304	0.953547	0.953547	CDH3/GJC1	2
GO:0031252	cell leading edge	2/60	48/2139	0.392534	0.953547	0.953547	ARF6/FAM206A	2
GO:0000790	nuclear chromatin	2/60	49/2139	0.402584	0.953547	0.953547	HDAC1/SINHCAF	2
GO:0000139	Golgi membrane	2/60	63/2139	0.534011	0.953547	0.953547	SEC23B/LARGE2	2
GO:0016604	nuclear body	2/60	63/2139	0.534011	0.953547	0.953547	EAF2/FAM206A	2
GO:0098797	plasma membrane protein complex	2/60	66/2139	0.559592	0.953547	0.953547	CDH3/GJC1	2
GO:0005730	nucleolus	2/60	71/2139	0.60003	0.953547	0.953547	SSRP1/BMT2	2
GO:0098791	Golgi subcompartment	2/60	76/2139	0.637688	0.953547	0.953547	SEC23B/LARGE2	2
GO:0044431	Golgi apparatus part	2/60	82/2139	0.679231	0.953547	0.953547	SEC23B/LARGE2	2
GO:0099513	polymeric cytoskeletal fiber	2/60	82/2139	0.679231	0.953547	0.953547	HOOK1/STMN1	2
GO:0044433	cytoplasmic vesicle part	2/60	96/2139	0.761403	0.953547	0.953547	SEC23B/ARF6	2
GO:0031967	organelle envelope	2/60	114/2139	0.840256	0.953547	0.953547	MTMR8/MX1	2
GO:0031975	envelope	2/60	114/2139	0.840256	0.953547	0.953547	MTMR8/MX1	2
GO:0098805	whole membrane	2/60	132/2139	0.895109	0.953547	0.953547	SEC23B/ARF6	2
GO:0030054	cell junction	2/60	135/2139	0.902375	0.953547	0.953547	CDH3/GJC1	2
GO:0005887	integral component of plasma membrane	2/60	141/2139	0.915543	0.953547	0.953547	NEO1/PTCH1	2
GO:0031226	intrinsic component of plasma membrane	2/60	147/2139	0.927059	0.953547	0.953547	NEO1/PTCH1	2
GO:0030660	Golgi-associated vesicle membrane	1/60	10/2139	0.248078	0.953547	0.953547	SEC23B	1
GO:0016342	catenin complex	1/60	11/2139	0.269269	0.953547	0.953547	CDH3	1
GO:0055038	recycling endosome membrane	1/60	11/2139	0.269269	0.953547	0.953547	ARF6	1
GO:1905368	peptidase complex	1/60	11/2139	0.269269	0.953547	0.953547	SPCS3	1
GO:0005798	Golgi-associated vesicle	1/60	12/2139	0.289873	0.953547	0.953547	SEC23B	1
GO:0030135	coated vesicle	1/60	13/2139	0.309904	0.953547	0.953547	SEC23B	1
GO:0030658	transport vesicle membrane	1/60	13/2139	0.309904	0.953547	0.953547	SEC23B	1
GO:0005913	cell-cell adherens junction	1/60	15/2139	0.348315	0.953547	0.953547	CDH3	1
GO:0030496	midbody	1/60	15/2139	0.348315	0.953547	0.953547	ARF6	1
GO:0034708	methyltransferase complex	1/60	15/2139	0.348315	0.953547	0.953547	METTL14	1
GO:0042470	melanosome	1/60	15/2139	0.348315	0.953547	0.953547	HSP90AB1	1
GO:0048770	pigment granule	1/60	15/2139	0.348315	0.953547	0.953547	HSP90AB1	1
GO:0030139	endocytic vesicle	1/60	16/2139	0.366725	0.953547	0.953547	ARF6	1
GO:0031256	leading edge membrane	1/60	16/2139	0.366725	0.953547	0.953547	ARF6	1
GO:0001726	ruffle	1/60	20/2139	0.435383	0.953547	0.953547	ARF6	1
GO:0005581	collagen trimer	1/60	20/2139	0.435383	0.953547	0.953547	MBL2	1
GO:0030426	growth cone	1/60	20/2139	0.435383	0.953547	0.953547	FAM206A	1
GO:0030427	site of polarized growth	1/60	20/2139	0.435383	0.953547	0.953547	FAM206A	1
GO:0055037	recycling endosome	1/60	20/2139	0.435383	0.953547	0.953547	ARF6	1
GO:0000786	nucleosome	1/60	22/2139	0.466912	0.953547	0.953547	HIST1H2B5	1
GO:0016459	myosin complex	1/60	22/2139	0.466912	0.953547	0.953547	MYO1G	1
GO:0044815	DNA packaging complex	1/60	22/2139	0.466912	0.953547	0.953547	HIST1H2B5	1
GO:0150034	distal axon	1/60	24/2139	0.496709	0.953547	0.953547	FAM206A	1
GO:0019897	extrinsic component of plasma membrane	1/60	26/2139	0.524866	0.953547	0.953547	CDH3	1
GO:0030027	lamellipodium	1/60	26/2139	0.524866	0.953547	0.953547	FAM206A	1
GO:0098798	mitochondrial protein complex	1/60	26/2139	0.524866	0.953547	0.953547	SUPV3L1	1
GO:0030133	transport vesicle	1/60	28/2139	0.551472	0.953547	0.953547	SEC23B	1
GO:0031253	cell projection membrane	1/60	28/2139	0.551472	0.953547	0.953547	ARF6	1
GO:0062023	collagen-containing extracellular matrix	1/60	32/2139	0.600366	0.953547	0.953547	MGP	1
GO:0032993	protein-DNA complex	1/60	34/2139	0.622807	0.953547	0.953547	HIST1H2B5	1
GO:0005938	cell cortex	1/60	35/2139	0.633558	0.953547	0.953547	ARF6	1
GO:0030659	cytoplasmic vesicle membrane	1/60	37/2139	0.654165	0.953547	0.953547	SEC23B	1
GO:0012506	vesicle membrane	1/60	39/2139	0.673631	0.953547	0.953547	SEC23B	1
GO:0005912	adherens junction	1/60	41/2139	0.692019	0.953547	0.953547	CDH3	1
GO:0070161	anchoring junction	1/60	41/2139	0.692019	0.953547	0.953547	CDH3	1
GO:0099568	cytoplasmic region	1/60	42/2139	0.700826	0.953547	0.953547	ARF6	1
GO:0030017	sarcomere	1/60	43/2139	0.709386	0.953547	0.953547	NEO1	1
GO:0044449	contractile fiber part	1/60	46/2139	0.733647	0.953547	0.953547	NEO1	1
GO:0005635	nuclear envelope	1/60	47/2139	0.741283	0.953547	0.953547	MTMR8	1
GO:0030016	myofibril	1/60	51/2139	0.76973	0.953547	0.953547	NEO1	1
GO:0043292	contractile fiber	1/60	52/2139	0.776347	0.953547	0.953547	NEO1	1
GO:0030425	dendrite	1/60	55/2139	0.795097	0.953547	0.953547	FAM206A	1
GO:0048471	perinuclear region of cytoplasm	1/60	55/2139	0.795097	0.953547	0.953547	SEC23B	1
GO:0097447	dendritic tree	1/60	55/2139	0.795097	0.953547	0.953547	FAM206A	1
GO:0010008	endosome membrane	1/60	56/2139	0.800996	0.953547	0.953547	ARF6	1
GO:0005667	transcription factor complex	1/60	59/2139	0.81771	0.953547	0.953547	HSP90AB1	1
GO:0044440	endosomal part	1/60	61/2139	0.828077	0.953547	0.953547	ARF6	1
GO:0009986	cell surface	1/60	62/2139	0.833041	0.953547	0.953547	CDH3	1
GO:0031966	mitochondrial membrane	1/60	63/2139	0.837864	0.953547	0.953547	MX1	1
GO:0043235	receptor complex	1/60	67/2139	0.855824	0.953547	0.953547	HSP90AB1	1
GO:0005740	mitochondrial envelope	1/60	69/2139	0.864055	0.953547	0.953547	MX1	1
GO:0015629	actin cytoskeleton	1/60	77/2139	0.892603	0.953547	0.953547	MYO1G	1
GO:0005768	endosome	1/60	89/2139	0.92472	0.953547	0.953547	ARF6	1
GO:1990234	transferase complex	1/60	96/2139	0.938872	0.958848	0.958848	METTL14	1
GO:0098590	plasma membrane region	1/60	101/2139	0.947344	0.960687	0.960687	ARF6	1
GO:0005615	extracellular space	1/60	217/2139	0.998517	0.998517	0.998517	TGFB2	1

## Sheet: MF
ID	Term	GeneRatio	BgRatio	PValue	p.adjust	qvalue	geneID	Count
GO:0046872	metal ion binding	15/57	473/1910	0.442739	0.913868	0.9015	CDH3/CYP1A2/TK1/SEC23B/MSMO1/C1GALT1/METAP1/SUV39H2/NT5C3B/EARS2/EGR1/LARGE2/MGP/VSNL1/DOHH	15
GO:0043169	cation binding	15/57	487/1910	0.494564	0.913868	0.9015	CDH3/CYP1A2/TK1/SEC23B/MSMO1/C1GALT1/METAP1/SUV39H2/NT5C3B/EARS2/EGR1/LARGE2/MGP/VSNL1/DOHH	15
GO:0036094	small molecule binding	11/57	356/1910	0.503348	0.913868	0.9015	CYP1A2/SUPV3L1/TK1/AVD/ARF6/MBL2/NT5C3B/MYO1G/EARS2/HSP90AB1/MX1	11
GO:0008144	drug binding	10/57	252/1910	0.210426	0.913868	0.9015	CYP1A2/SUPV3L1/TK1/GPR50/SUV39H2/AVD/MYO1G/EARS2/BMT2/HSP90AB1	10
GO:0003677	DNA binding	10/57	376/1910	0.712111	0.913868	0.9015	SUPV3L1/HNF1A/SSRP1/HOXB4/HDX/EGR1/EAF2/TEF/HMGN3/HIST1H2B5	10
GO:0016740	transferase activity	9/57	280/1910	0.461279	0.913868	0.9015	TK1/C1GALT1/SUV39H2/LCAT/METTL2A/LARGE2/BMT2/METTL14/MBOAT2	9
GO:0043168	anion binding	9/57	363/1910	0.78442	0.913868	0.9015	FN1/SUPV3L1/TK1/AVD/ARF6/MYO1G/EARS2/HSP90AB1/MX1	9
GO:0046914	transition metal ion binding	8/57	115/1910	0.0186353	0.465884	0.459579	CYP1A2/TK1/SEC23B/MSMO1/SUV39H2/EARS2/EGR1/DOHH	8
GO:0000166	nucleotide binding	8/57	306/1910	0.716256	0.913868	0.9015	SUPV3L1/TK1/ARF6/NT5C3B/MYO1G/EARS2/HSP90AB1/MX1	8
GO:1901265	nucleoside phosphate binding	8/57	306/1910	0.716256	0.913868	0.9015	SUPV3L1/TK1/ARF6/NT5C3B/MYO1G/EARS2/HSP90AB1/MX1	8
GO:0097367	carbohydrate derivative binding	8/57	316/1910	0.751152	0.913868	0.9015	FN1/SUPV3L1/TK1/ARF6/MYO1G/EARS2/HSP90AB1/MX1	8
GO:0035639	purine ribonucleoside triphosphate binding	7/57	270/1910	0.716274	0.913868	0.9015	SUPV3L1/TK1/ARF6/MYO1G/EARS2/HSP90AB1/MX1	7
GO:0017076	purine nucleotide binding	7/57	280/1910	0.752809	0.913868	0.9015	SUPV3L1/TK1/ARF6/MYO1G/EARS2/HSP90AB1/MX1	7
GO:0032555	purine ribonucleotide binding	7/57	280/1910	0.752809	0.913868	0.9015	SUPV3L1/TK1/ARF6/MYO1G/EARS2/HSP90AB1/MX1	7
GO:0032553	ribonucleotide binding	7/57	281/1910	0.756282	0.913868	0.9015	SUPV3L1/TK1/ARF6/MYO1G/EARS2/HSP90AB1/MX1	7
GO:0016787	hydrolase activity	7/57	313/1910	0.850122	0.913868	0.9015	SUPV3L1/MTMR8/SPCS3/METAP1/HDAC1/MYO1G/MX1	7
GO:0008092	cytoskeletal protein binding	6/57	134/1910	0.206237	0.913868	0.9015	CDH3/HOOK1/STMN1/MYO1G/MX1/FAM206A	6
GO:0019899	enzyme binding	6/57	139/1910	0.230708	0.913868	0.9015	DNAJC3/ARF6/MON1A/EGR1/HSP90AB1/MBP	6
GO:0140110	transcription regulator activity	6/57	207/1910	0.595649	0.913868	0.9015	CITED4/HNF1A/HOXB4/EGR1/EAF2/TEF	6
GO:0140096	catalytic activity, acting on a protein	6/57	249/1910	0.773877	0.913868	0.9015	MTMR8/C1GALT1/SPCS3/METAP1/SUV39H2/HDAC1	6
GO:0140098	catalytic activity, acting on RNA	5/57	37/1910	0.00416027	0.364024	0.359097	SUPV3L1/METTL2A/EARS2/BMT2/METTL14	5
GO:0008270	zinc ion binding	5/57	75/1910	0.0697641	0.913868	0.9015	TK1/SEC23B/SUV39H2/EARS2/EGR1	5
GO:0048037	cofactor binding	5/57	78/1910	0.079795	0.913868	0.9015	CYP1A2/SUV39H2/AVD/BMT2/DOHH	5
GO:0044212	transcription regulatory region DNA binding	5/57	132/1910	0.358368	0.913868	0.9015	HNF1A/HOXB4/EGR1/EAF2/TEF	5
GO:0001067	regulatory region nucleic acid binding	5/57	133/1910	0.364497	0.913868	0.9015	HNF1A/HOXB4/EGR1/EAF2/TEF	5
GO:0042802	identical protein binding	5/57	151/1910	0.474302	0.913868	0.9015	CDH3/TK1/GPR50/TGFB2/NDC80	5
GO:0003700	DNA-binding transcription factor activity	5/57	171/1910	0.589111	0.913868	0.9015	HNF1A/HOXB4/EGR1/EAF2/TEF	5
GO:0005524	ATP binding	5/57	213/1910	0.780315	0.913868	0.9015	SUPV3L1/TK1/MYO1G/EARS2/HSP90AB1	5
GO:0030554	adenyl nucleotide binding	5/57	222/1910	0.811187	0.913868	0.9015	SUPV3L1/TK1/MYO1G/EARS2/HSP90AB1	5
GO:0032559	adenyl ribonucleotide binding	5/57	222/1910	0.811187	0.913868	0.9015	SUPV3L1/TK1/MYO1G/EARS2/HSP90AB1	5
GO:0008757	S-adenosylmethionine-dependent methyltransferase activity	4/57	23/1910	0.00413556	0.364024	0.359097	SUV39H2/METTL2A/BMT2/METTL14	4
GO:0008168	methyltransferase activity	4/57	29/1910	0.00970839	0.465884	0.459579	SUV39H2/METTL2A/BMT2/METTL14	4
GO:1901681	sulfur compound binding	4/57	32/1910	0.0137541	0.465884	0.459579	FN1/SUV39H2/AVD/BMT2	4
GO:0016741	transferase activity, transferring one-carbon groups	4/57	34/1910	0.016971	0.465884	0.459579	SUV39H2/METTL2A/BMT2/METTL14	4
GO:0000977	RNA polymerase II regulatory region sequence-specific DNA binding	4/57	98/1910	0.334919	0.913868	0.9015	HOXB4/EGR1/EAF2/TEF	4
GO:0001012	RNA polymerase II regulatory region DNA binding	4/57	99/1910	0.341878	0.913868	0.9015	HOXB4/EGR1/EAF2/TEF	4
GO:0016491	oxidoreductase activity	4/57	107/1910	0.39763	0.913868	0.9015	CYP1A2/MSMO1/HSD11B1L/DOHH	4
GO:0000981	DNA-binding transcription factor activity, RNA polymerase II-specific	4/57	108/1910	0.404577	0.913868	0.9015	HOXB4/EGR1/EAF2/TEF	4
GO:0000976	transcription regulatory region sequence-specific DNA binding	4/57	112/1910	0.43223	0.913868	0.9015	HOXB4/EGR1/EAF2/TEF	4
GO:1990837	sequence-specific double-stranded DNA binding	4/57	115/1910	0.452776	0.913868	0.9015	HOXB4/EGR1/EAF2/TEF	4
GO:0003690	double-stranded DNA binding	4/57	136/1910	0.588441	0.913868	0.9015	HOXB4/EGR1/EAF2/TEF	4
GO:0046983	protein dimerization activity	4/57	170/1910	0.76242	0.913868	0.9015	CDH3/TGFB2/HSP90AB1/HIST1H2B5	4
GO:0043565	sequence-specific DNA binding	4/57	193/1910	0.844585	0.913868	0.9015	HOXB4/EGR1/EAF2/TEF	4
GO:0098772	molecular function regulator	4/57	217/1910	0.904021	0.953034	0.940136	SEC23B/TGFB2/DNAJC3/MON1A	4
GO:0004497	monooxygenase activity	3/57	16/1910	0.0107099	0.465884	0.459579	CYP1A2/MSMO1/DOHH	3
GO:0005506	iron ion binding	3/57	25/1910	0.0363931	0.758478	0.748213	CYP1A2/MSMO1/DOHH	3
GO:0016705	oxidoreductase activity, acting on paired donors, with incorporation or reduction of molecular oxygen	3/57	27/1910	0.0443867	0.758478	0.748213	CYP1A2/MSMO1/DOHH	3
GO:0033218	amide binding	3/57	27/1910	0.0443867	0.758478	0.748213	GPR50/TGFB2/AVD	3
GO:0050662	coenzyme binding	3/57	34/1910	0.0785094	0.913868	0.9015	SUV39H2/AVD/BMT2	3
GO:0015631	tubulin binding	3/57	36/1910	0.0898841	0.913868	0.9015	HOOK1/STMN1/MX1	3
GO:0001228	DNA-binding transcription activator activity, RNA polymerase II-specific	3/57	53/1910	0.208582	0.913868	0.9015	HOXB4/EAF2/TEF	3
GO:0005509	calcium ion binding	3/57	100/1910	0.582521	0.913868	0.9015	CDH3/MGP/VSNL1	3
GO:0022857	transmembrane transporter activity	3/57	114/1910	0.673	0.913868	0.9015	SLC2A2/GJC1/SLC7A2	3
GO:0005215	transporter activity	3/57	129/1910	0.753537	0.913868	0.9015	SLC2A2/GJC1/SLC7A2	3
GO:0017111	nucleoside-triphosphatase activity	3/57	131/1910	0.763011	0.913868	0.9015	SUPV3L1/MYO1G/MX1	3
GO:0016462	pyrophosphatase activity	3/57	133/1910	0.772197	0.913868	0.9015	SUPV3L1/MYO1G/MX1	3
GO:0038023	signaling receptor activity	3/57	134/1910	0.776683	0.913868	0.9015	NEO1/GPR50/PTCH1	3
GO:0016817	hydrolase activity, acting on acid anhydrides	3/57	136/1910	0.785444	0.913868	0.9015	SUPV3L1/MYO1G/MX1	3
GO:0016818	hydrolase activity, acting on acid anhydrides, in phosphorus-containing anhydrides	3/57	136/1910	0.785444	0.913868	0.9015	SUPV3L1/MYO1G/MX1	3
GO:0060089	molecular transducer activity	3/57	136/1910	0.785444	0.913868	0.9015	NEO1/GPR50/PTCH1	3
GO:0003723	RNA binding	3/57	147/1910	0.8288	0.913868	0.9015	SUPV3L1/EARS2/METTL14	3
GO:0140101	catalytic activity, acting on a tRNA	2/57	12/1910	0.0476758	0.758478	0.748213	METTL2A/EARS2	2
GO:0016758	transferase activity, transferring hexosyl groups	2/57	19/1910	0.108248	0.913868	0.9015	C1GALT1/LARGE2	2
GO:0005516	calmodulin binding	2/57	26/1910	0.180684	0.913868	0.9015	MYO1G/MBP	2
GO:0008017	microtubule binding	2/57	27/1910	0.191588	0.913868	0.9015	HOOK1/MX1	2
GO:0016746	transferase activity, transferring acyl groups	2/57	29/1910	0.213647	0.913868	0.9015	LCAT/MBOAT2	2
GO:0016757	transferase activity, transferring glycosyl groups	2/57	34/1910	0.269628	0.913868	0.9015	C1GALT1/LARGE2	2
GO:0019901	protein kinase binding	2/57	48/1910	0.423336	0.913868	0.9015	DNAJC3/HSP90AB1	2
GO:0019900	kinase binding	2/57	52/1910	0.464526	0.913868	0.9015	DNAJC3/HSP90AB1	2
GO:0005525	GTP binding	2/57	59/1910	0.532398	0.913868	0.9015	ARF6/MX1	2
GO:0008233	peptidase activity	2/57	59/1910	0.532398	0.913868	0.9015	SPCS3/METAP1	2
GO:0001882	nucleoside binding	2/57	60/1910	0.541622	0.913868	0.9015	ARF6/MX1	2
GO:0001883	purine nucleoside binding	2/57	60/1910	0.541622	0.913868	0.9015	ARF6/MX1	2
GO:0032549	ribonucleoside binding	2/57	60/1910	0.541622	0.913868	0.9015	ARF6/MX1	2
GO:0032550	purine ribonucleoside binding	2/57	60/1910	0.541622	0.913868	0.9015	ARF6/MX1	2
GO:0019001	guanyl nucleotide binding	2/57	64/1910	0.577282	0.913868	0.9015	ARF6/MX1	2
GO:0032561	guanyl ribonucleotide binding	2/57	64/1910	0.577282	0.913868	0.9015	ARF6/MX1	2
GO:0003779	actin binding	2/57	66/1910	0.59436	0.913868	0.9015	MYO1G/FAM206A	2
GO:0003682	chromatin binding	2/57	76/1910	0.672191	0.913868	0.9015	EGR1/HMGN3	2
GO:0008134	transcription factor binding	2/57	83/1910	0.719329	0.913868	0.9015	HOXB4/HDAC1	2
GO:0015318	inorganic molecular entity transmembrane transporter activity	2/57	95/1910	0.787101	0.913868	0.9015	GJC1/SLC7A2	2
GO:0015075	ion transmembrane transporter activity	2/57	99/1910	0.806341	0.913868	0.9015	GJC1/SLC7A2	2
GO:0042803	protein homodimerization activity	2/57	100/1910	0.810909	0.913868	0.9015	CDH3/TGFB2	2
GO:0004888	transmembrane signaling receptor activity	2/57	105/1910	0.832365	0.913868	0.9015	GPR50/PTCH1	2
GO:0030234	enzyme regulator activity	2/57	107/1910	0.840329	0.913868	0.9015	SEC23B/DNAJC3	2
GO:0005102	signaling receptor binding	2/57	161/1910	0.960774	0.978782	0.965536	TGFB2/PTCH1	2
GO:0004860	protein kinase inhibitor activity	1/57	10/1910	0.261918	0.913868	0.9015	DNAJC3	1
GO:0005085	guanyl-nucleotide exchange factor activity	1/57	10/1910	0.261918	0.913868	0.9015	MON1A	1
GO:0008237	metallopeptidase activity	1/57	10/1910	0.261918	0.913868	0.9015	METAP1	1
GO:0016763	transferase activity, transferring pentosyl groups	1/57	10/1910	0.261918	0.913868	0.9015	LARGE2	1
GO:0019210	kinase inhibitor activity	1/57	10/1910	0.261918	0.913868	0.9015	DNAJC3	1
GO:0019825	oxygen binding	1/57	10/1910	0.261918	0.913868	0.9015	CYP1A2	1
GO:0048029	monosaccharide binding	1/57	10/1910	0.261918	0.913868	0.9015	MBL2	1
GO:1902936	phosphatidylinositol bisphosphate binding	1/57	10/1910	0.261918	0.913868	0.9015	MYO1G	1
GO:1990841	promoter-specific chromatin binding	1/57	10/1910	0.261918	0.913868	0.9015	EGR1	1
GO:0003678	DNA helicase activity	1/57	11/1910	0.28406	0.913868	0.9015	SUPV3L1	1
GO:0008170	N-methyltransferase activity	1/57	11/1910	0.28406	0.913868	0.9015	SUV39H2	1
GO:0008276	protein methyltransferase activity	1/57	11/1910	0.28406	0.913868	0.9015	SUV39H2	1
GO:0016811	hydrolase activity, acting on carbon-nitrogen (but not peptide) bonds, in linear amides	1/57	11/1910	0.28406	0.913868	0.9015	HDAC1	1
GO:0000049	tRNA binding	1/57	12/1910	0.30555	0.913868	0.9015	EARS2	1
GO:0002020	protease binding	1/57	12/1910	0.30555	0.913868	0.9015	MBP	1
GO:0008026	ATP-dependent helicase activity	1/57	12/1910	0.30555	0.913868	0.9015	SUPV3L1	1
GO:0008194	UDP-glycosyltransferase activity	1/57	12/1910	0.30555	0.913868	0.9015	LARGE2	1
GO:0070035	purine NTP-dependent helicase activity	1/57	12/1910	0.30555	0.913868	0.9015	SUPV3L1	1
GO:1901981	phosphatidylinositol phosphate binding	1/57	12/1910	0.30555	0.913868	0.9015	MYO1G	1
GO:0005160	transforming growth factor beta receptor binding	1/57	13/1910	0.326405	0.913868	0.9015	TGFB2	1
GO:0016830	carbon-carbon lyase activity	1/57	13/1910	0.326405	0.913868	0.9015	ODC1	1
GO:0033613	activating transcription factor binding	1/57	13/1910	0.326405	0.913868	0.9015	HOXB4	1
GO:0031492	nucleosomal DNA binding	1/57	15/1910	0.366287	0.913868	0.9015	HMGN3	1
GO:0035091	phosphatidylinositol binding	1/57	15/1910	0.366287	0.913868	0.9015	MYO1G	1
GO:0045296	cadherin binding	1/57	15/1910	0.366287	0.913868	0.9015	CDH3	1
GO:0003774	motor activity	1/57	16/1910	0.385349	0.913868	0.9015	MYO1G	1
GO:0004725	protein tyrosine phosphatase activity	1/57	16/1910	0.385349	0.913868	0.9015	MTMR8	1
GO:0008509	anion transmembrane transporter activity	1/57	16/1910	0.385349	0.913868	0.9015	SLC7A2	1
GO:0031491	nucleosome binding	1/57	17/1910	0.403847	0.913868	0.9015	HMGN3	1
GO:0042277	peptide binding	1/57	18/1910	0.421797	0.913868	0.9015	TGFB2	1
GO:0005096	GTPase activator activity	1/57	19/1910	0.439217	0.913868	0.9015	SEC23B	1
GO:0030695	GTPase regulator activity	1/57	19/1910	0.439217	0.913868	0.9015	SEC23B	1
GO:0030246	carbohydrate binding	1/57	20/1910	0.45612	0.913868	0.9015	MBL2	1
GO:0051082	unfolded protein binding	1/57	20/1910	0.45612	0.913868	0.9015	HSP90AB1	1
GO:0016810	hydrolase activity, acting on carbon-nitrogen (but not peptide) bonds	1/57	21/1910	0.472523	0.913868	0.9015	HDAC1	1
GO:0031490	chromatin DNA binding	1/57	21/1910	0.472523	0.913868	0.9015	HMGN3	1
GO:0031406	carboxylic acid binding	1/57	22/1910	0.488439	0.913868	0.9015	AVD	1
GO:0042562	hormone binding	1/57	22/1910	0.488439	0.913868	0.9015	GPR50	1
GO:0016874	ligase activity	1/57	23/1910	0.503884	0.913868	0.9015	EARS2	1
GO:0008201	heparin binding	1/57	24/1910	0.51887	0.913868	0.9015	FN1	1
GO:0019842	vitamin binding	1/57	24/1910	0.51887	0.913868	0.9015	AVD	1
GO:0051020	GTPase binding	1/57	24/1910	0.51887	0.913868	0.9015	MON1A	1
GO:0060589	nucleoside-triphosphatase regulator activity	1/57	24/1910	0.51887	0.913868	0.9015	SEC23B	1
GO:0004721	phosphoprotein phosphatase activity	1/57	25/1910	0.533411	0.913868	0.9015	MTMR8	1
GO:0016747	transferase activity, transferring acyl groups other than amino-acyl groups	1/57	25/1910	0.533411	0.913868	0.9015	LCAT	1
GO:0000287	magnesium ion binding	1/57	27/1910	0.56121	0.913868	0.9015	NT5C3B	1
GO:0020037	heme binding	1/57	27/1910	0.56121	0.913868	0.9015	CYP1A2	1
GO:0003713	transcription coactivator activity	1/57	28/1910	0.574492	0.913868	0.9015	CITED4	1
GO:0004386	helicase activity	1/57	28/1910	0.574492	0.913868	0.9015	SUPV3L1	1
GO:0005125	cytokine activity	1/57	28/1910	0.574492	0.913868	0.9015	TGFB2	1
GO:0019887	protein kinase regulator activity	1/57	28/1910	0.574492	0.913868	0.9015	DNAJC3	1
GO:0043177	organic acid binding	1/57	28/1910	0.574492	0.913868	0.9015	AVD	1
GO:0046906	tetrapyrrole binding	1/57	28/1910	0.574492	0.913868	0.9015	CYP1A2	1
GO:0005539	glycosaminoglycan binding	1/57	30/1910	0.599883	0.913868	0.9015	FN1	1
GO:0005543	phospholipid binding	1/57	30/1910	0.599883	0.913868	0.9015	MYO1G	1
GO:0050839	cell adhesion molecule binding	1/57	30/1910	0.599883	0.913868	0.9015	CDH3	1
GO:0019207	kinase regulator activity	1/57	31/1910	0.612014	0.913868	0.9015	DNAJC3	1
GO:0001077	proximal promoter DNA-binding transcription activator activity, RNA polymerase II-specific	1/57	32/1910	0.623784	0.913868	0.9015	TEF	1
GO:0001664	G protein-coupled receptor binding	1/57	32/1910	0.623784	0.913868	0.9015	PTCH1	1
GO:0016791	phosphatase activity	1/57	32/1910	0.623784	0.913868	0.9015	MTMR8	1
GO:0008083	growth factor activity	1/57	35/1910	0.657028	0.913868	0.9015	TGFB2	1
GO:0003729	mRNA binding	1/57	36/1910	0.667454	0.913868	0.9015	METTL14	1
GO:0140097	catalytic activity, acting on DNA	1/57	36/1910	0.667454	0.913868	0.9015	SUPV3L1	1
GO:0005126	cytokine receptor binding	1/57	39/1910	0.6969	0.913868	0.9015	TGFB2	1
GO:0016829	lyase activity	1/57	39/1910	0.6969	0.913868	0.9015	ODC1	1
GO:0042578	phosphoric ester hydrolase activity	1/57	39/1910	0.6969	0.913868	0.9015	MTMR8	1
GO:0008047	enzyme activator activity	1/57	40/1910	0.706134	0.913868	0.9015	SEC23B	1
GO:0004930	G protein-coupled receptor activity	1/57	42/1910	0.723781	0.913868	0.9015	GPR50	1
GO:0003924	GTPase activity	1/57	43/1910	0.732209	0.913868	0.9015	MX1	1
GO:0000982	transcription factor activity, RNA polymerase II proximal promoter sequence-specific DNA binding	1/57	44/1910	0.740385	0.913868	0.9015	TEF	1
GO:0004857	enzyme inhibitor activity	1/57	45/1910	0.748315	0.913868	0.9015	DNAJC3	1
GO:0003712	transcription coregulator activity	1/57	50/1910	0.784533	0.913868	0.9015	CITED4	1
GO:0042623	ATPase activity, coupled	1/57	51/1910	0.791136	0.913868	0.9015	SUPV3L1	1
GO:0070011	peptidase activity, acting on L-amino acid peptides	1/57	53/1910	0.803751	0.913868	0.9015	METAP1	1
GO:0005216	ion channel activity	1/57	58/1910	0.832106	0.913868	0.9015	GJC1	1
GO:0022838	substrate-specific channel activity	1/57	59/1910	0.837273	0.913868	0.9015	GJC1	1
GO:0015267	channel activity	1/57	62/1910	0.851856	0.913868	0.9015	GJC1	1
GO:0022803	passive transmembrane transporter activity	1/57	62/1910	0.851856	0.913868	0.9015	GJC1	1
GO:0016887	ATPase activity	1/57	63/1910	0.856425	0.913868	0.9015	SUPV3L1	1
GO:0046982	protein heterodimerization activity	1/57	63/1910	0.856425	0.913868	0.9015	HIST1H2B5	1
GO:0008289	lipid binding	1/57	68/1910	0.877275	0.930443	0.91785	MYO1G	1
GO:0008324	cation transmembrane transporter activity	1/57	80/1910	0.915934	0.959811	0.946821	SLC7A2	1
GO:0016788	hydrolase activity, acting on ester bonds	1/57	87/1910	0.932662	0.971523	0.958374	MTMR8	1
GO:0048018	receptor ligand activity	1/57	95/1910	0.947799	0.978782	0.965536	TGFB2	1
GO:0030545	receptor regulator activity	1/57	98/1910	0.952567	0.978782	0.965536	TGFB2	1
GO:0016301	kinase activity	1/57	108/1910	0.965571	0.978782	0.965536	TK1	1
GO:0005198	structural molecule activity	1/57	116/1910	0.973391	0.978782	0.965536	MBP	1
GO:0016772	transferase activity, transferring phosphorus-containing groups	1/57	123/1910	0.978782	0.978782	0.965536	TK1	1
GO:0044877	protein-containing complex binding	1/57	123/1910	0.978782	0.978782	0.965536	HMGN3	1
